# Supplementary material for: Examining the Relationship between Aptamer Complexity and Molecular Discrimination of a Low-Epitope Target
Source: PubMed Central journal article supplement (PMC11672540; doi:10.1021/acscentsci.4c01377), 2024-11-11
Supplement: oc4c01377_si_001.pdf [file oc4c01377_si_001.pdf]

**Supporting Information for:**

**Examining the Relationship Between Aptamer Complexity and Molecular  
Discrimination of a Low-Epitope Target**

Linlin Wang, Juan Canoura, Caleb Byrd, Thinh Nguyen, Obtin Alkhamis, Phuong Ly and Yi Xiao\*

Department of Chemistry, North Carolina State University, 2620 Yarbrough Dr., Raleigh, NC, USA,  
27695

\*Corresponding author: [yxiao34@ncsu.edu](mailto:yxiao34@ncsu.edu)

**Table S1.** List of DNA sequences used for SELEX.

| <b>Name</b>          | <b>Sequence</b>                                                  |
|----------------------|------------------------------------------------------------------|
| Trial 1 & 2 Library  | GGAGGCTCTCGGGACGAC (N30) GTCGTCCCGCCTTTAGGATTTACAG               |
| Trial 3 Library      | GGAGGCTCTCGGGACGAC (N40) GTCGTCCCGCCTTTAGGATTTACAG               |
| Trial 4 Library      | TCCATAGCTCCTTGTTCAAATCT (N40) AGTCTAGATTTGAATTCTCGGATACAACGA     |
| Trial 1-3 FP         | GGAGGCTCTCGGGACGAC                                               |
| Trial 1-3 RP-bio     | /5Bio/-CTGTAAATCCTAAAGGCGGGACGAC                                 |
| Trial 1-3 cDNA15-bio | GTCGTCCCGAGAGCCATA-/3Bio/                                        |
| Trial 1-3 FP-HTS     | ACACTCTTCCCTACACGACGCTCTTCCGATCT (N45) GGAGGCTCTCGGGACGAC        |
| Trial 1-3 RP-HTS     | GACTGGAGTTCAGACGTGTGCTCTTCCGATCT (N43) CTGTAAATCCTAAAGGCGGGACGAC |
| Trial 4 FP           | TCCATAGCTCCTTGTTCAAATCT                                          |
| Trial 4 RP-bio       | /5Bio/TCGTTGTATCCGAGAATTCAAATCT                                  |
| Trial 4 cDNA15-bio   | /5Bio/CGAGAATTCAAATCT                                            |
| Trial 4 FP-HTS       | ACACTCTTCCCTACACGACGCTCTTCCGATCT (N44) TCCATAGCTCCTTGTTCAA       |
| Trial 4 RP-HTS       | GACTGGAGTTCAGACGTGTGCTCTTCCGATCT (N45) TCGTTGTATCCGAGAATTCA      |

/5Bio/ = 5' biotin modification; /3Bio/ = 3' biotin modification.

**Table S2.** Selection strategy and conditions for the first trial of methamphetamine SELEX.

| Round | Pool Size (pmol) | Buffer Wash (×) | Counter-SELEX targets                                                                                                                                                                                                                                                                                                                                                                                                                                                                                                                                                                     | Buffer Wash (×) | [Target] (μM) |
|-------|------------------|-----------------|-------------------------------------------------------------------------------------------------------------------------------------------------------------------------------------------------------------------------------------------------------------------------------------------------------------------------------------------------------------------------------------------------------------------------------------------------------------------------------------------------------------------------------------------------------------------------------------------|-----------------|---------------|
| 1     | 1,000            | 10              | None                                                                                                                                                                                                                                                                                                                                                                                                                                                                                                                                                                                      | None            | 100           |
| 2     | 447              | 20              | 100 μM PRO (250 μL ×3), 100 μM LIDO (250 μL ×3), 100 μM CAF (250 μL ×3), 100 μM PMZ (250 μL ×3), 100 μM QUI (250 μL ×3), 100 μM DPH (250 μL ×3), 100 μM FEN (250 μL ×3), 100 μM COC (250 μL ×3)                                                                                                                                                                                                                                                                                                                                                                                           | 28              | 100           |
| 3     | 300              | 20              | 100 μM PRO (250 μL ×3), 100 μM LIDO (250 μL ×3), 100 μM CAF (250 μL ×3), 100 μM PMZ (250 μL ×3), 100 μM QUI (250 μL ×3), 100 μM DPH (250 μL ×3), 100 μM FEN (250 μL ×3), 100 μM COC (250 μL ×3), 100 μM AMP (250 μL ×3), 100 μM DOP (250 μL ×3), 100 μM 4-HMA (250 μL ×3), 100 μM TYM (250 μL ×3), 100 μM 4-HA (250 μL ×3), 100 μM SER (250 μL ×3)                                                                                                                                                                                                                                        | 30              | 100           |
| 4     | 300              | 20              | 100 μM PRO (250 μL ×3), 100 μM LIDO (250 μL ×3), 100 μM CAF (250 μL ×3), 100 μM PMZ (250 μL ×3), 100 μM QUI (250 μL ×3), 100 μM DPH (250 μL ×3), 100 μM FEN (250 μL ×3), 100 μM COC (250 μL ×3), 100 μM AMP (250 μL ×3), 100 μM DOP (250 μL ×3), 100 μM 4-HMA (250 μL ×3), 100 μM TYM (250 μL ×3), 100 μM 4-HA (250 μL ×3), 100 μM SER (250 μL ×3), 100 μM DOPAC (250 μL ×3), 100 μM HVA (250 μL ×3)                                                                                                                                                                                      | 30              | 100           |
| 5     | 300              | 20              | 100 μM PRO (250 μL ×3), 100 μM LIDO (250 μL ×3), 100 μM PMZ (250 μL ×3), 100 μM CAF + QUI (250 μL ×3), 100 μM DPH (250 μL ×3), 100 μM FEN (250 μL ×6), 100 μM COC (250 μL ×3), 100 μM DOPAC + HVA (250 μL ×3), 100 μM PSU (250 μL ×3), 100 μM NE + EPI (250 μL ×3), 100 μM BPP (250 μL ×3), 100 μM METD + MOR (250 μL ×3), 100 μM MDPV + MDMA (250 μL ×3), 100 μM AMP (250 μL ×3), 100 μM DOP (250 μL ×3), 100 μM 4-HMA (250 μL ×3), 100 μM TYM (250 μL ×3), 100 μM 4-HA (250 μL ×3), 100 μM SER (250 μL ×3)                                                                              | 30              | 100           |
| 6     | 300              | 30              | 100 μM PRO (250 μL ×3), 100 μM LIDO (250 μL ×3), 100 μM PMZ (250 μL ×3), 100 μM CAF + QUI (250 μL ×3), 100 μM DPH (250 μL ×3), 100 μM FEN (250 μL ×6), 100 μM COC (250 μL ×3), 100 μM DOPAC + HVA (250 μL ×3), 100 μM MPD (250 μL ×3), 100 μM PSU (250 μL ×3), 100 μM NE + EPI (250 μL ×3), 100 μM BPP (250 μL ×3), 100 μM METD + MOR (250 μL ×3), 100 μM MDPV + MDMA (250 μL ×3), 100 μM AMP (250 μL ×3), 100 μM DOP (250 μL ×3), 100 μM 4-HMA (250 μL ×3), 100 μM TYM (250 μL ×3), 100 μM 4-HA (250 μL ×3), 100 μM SER (250 μL ×3)                                                      | 30              | 75            |
| 7     | 300              | 30              | 250 μM PRO (250 μL ×3), 250 μM LIDO (250 μL ×3), 250 μM PMZ (250 μL ×3), 250 μM CAF + QUI (250 μL ×3), 250 μM DPH (250 μL ×3), 250 μM FEN (250 μL ×6), 250 μM COC (250 μL ×3), 250 μM DOPAC + HVA (250 μL ×3), 250 μM MPD (250 μL ×3), 50 μM ALP (250 μL ×3), 250 μM PSU (250 μL ×3), 250 μM NE + EPI (250 μL ×3), 250 μM BPP (250 μL ×3), 250 μM METD + MOR (250 μL ×3), 250 μM MDPV + MDMA (250 μL ×3), 250 μM AMP (250 μL ×3), 250 μM DOP (250 μL ×3), 250 μM 4-HMA (250 μL ×3), 250 μM TYM (250 μL ×3), 250 μM 4-HA (250 μL ×3), 250 μM SER (250 μL ×3), 250 μM TYR + PHE (250 μL ×3) | 30              | 50            |
| 8     | 300              | 30              | 250 μM PRO (250 μL ×3), 250 μM LIDO (250 μL ×3), 250 μM PMZ (250 μL ×3), 250 μM CAF + QUI (250 μL ×3), 250 μM DPH (250 μL ×3), 250 μM FEN (250 μL ×6), 250 μM COC (250 μL ×3), 250 μM DOPAC + HVA (250 μL ×3), 250 μM MPD (250 μL ×3), 50 μM ALP (250 μL ×3), 250 μM PSU (250 μL ×3), 250 μM NE + EPI (250 μL ×3), 250 μM BPP (250 μL ×6), 250 μM METD + MOR (250 μL ×3), 250 μM MDPV + MDMA (250 μL ×3), 250 μM AMP (250 μL ×3), 250 μM DOP (250 μL ×3), 250 μM 4-HMA (250 μL ×3), 250 μM TYM (250 μL ×3), 250 μM 4-HA (250 μL ×3), 250 μM SER (250 μL ×3), 250 μM TYR + PHE (250 μL ×3) | 30              | 50            |
| 9     | 300              | 30              | Same as previous round                                                                                                                                                                                                                                                                                                                                                                                                                                                                                                                                                                    | 30              | 50            |
| 10    | 300              | 30              | Same as previous round                                                                                                                                                                                                                                                                                                                                                                                                                                                                                                                                                                    | 30              | 50            |
| 11    | 300              | 30              | 250 μM PRO (250 μL ×3), 250 μM LIDO (250 μL ×3), 250 μM PMZ (250 μL ×3), 250 μM CAF + QUI (250 μL ×3), 250 μM DPH (250 μL ×3), 250 μM AMP (250 μL ×3), 250 μM COC (250 μL ×3), 250 μM DOPAC + HVA (250 μL ×3), 250 μM MPD (250 μL ×3), 50 μM ALP (250 μL ×3), 250 μM PSU (250 μL ×3), 250 μM NE + EPI (250 μL ×3), 250 μM BPP (250 μL ×6), 250 μM METD + MOR (250 μL ×3)                                                                                                                                                                                                                  | 30              | 50            |

|           |     |    |                                                                                                                                                                                                                                                                                                                                                                                                                                                                                                                                                                                                                                                                                                                                                                                                                                                                                                                                                                                                                                                                                                                                                                                                   |    |    |
|-----------|-----|----|---------------------------------------------------------------------------------------------------------------------------------------------------------------------------------------------------------------------------------------------------------------------------------------------------------------------------------------------------------------------------------------------------------------------------------------------------------------------------------------------------------------------------------------------------------------------------------------------------------------------------------------------------------------------------------------------------------------------------------------------------------------------------------------------------------------------------------------------------------------------------------------------------------------------------------------------------------------------------------------------------------------------------------------------------------------------------------------------------------------------------------------------------------------------------------------------------|----|----|
|           |     |    | $\mu\text{L} \times 3$ ), 250 $\mu\text{M}$ MDPV + MDMA (250 $\mu\text{L} \times 3$ ), 250 $\mu\text{M}$ FEN (250 $\mu\text{L} \times 6$ ), 250 $\mu\text{M}$ DOP (250 $\mu\text{L} \times 3$ ), 250 $\mu\text{M}$ 4-HMA (250 $\mu\text{L} \times 3$ ), 250 $\mu\text{M}$ TYM (250 $\mu\text{L} \times 3$ ), 250 $\mu\text{M}$ 4-HA (250 $\mu\text{L} \times 3$ ), 250 $\mu\text{M}$ SER (250 $\mu\text{L} \times 3$ ), 250 $\mu\text{M}$ TYR + PHE (250 $\mu\text{L} \times 3$ )                                                                                                                                                                                                                                                                                                                                                                                                                                                                                                                                                                                                                                                                                                                 |    |    |
| <b>12</b> | 300 | 30 | Same as previous round                                                                                                                                                                                                                                                                                                                                                                                                                                                                                                                                                                                                                                                                                                                                                                                                                                                                                                                                                                                                                                                                                                                                                                            | 30 | 50 |
| <b>13</b> | 300 | 30 | Same as previous round                                                                                                                                                                                                                                                                                                                                                                                                                                                                                                                                                                                                                                                                                                                                                                                                                                                                                                                                                                                                                                                                                                                                                                            | 30 | 50 |
| <b>14</b> | 300 | 30 | Same as previous round                                                                                                                                                                                                                                                                                                                                                                                                                                                                                                                                                                                                                                                                                                                                                                                                                                                                                                                                                                                                                                                                                                                                                                            | 30 | 50 |
| <b>15</b> | 300 | 30 | Same as previous round                                                                                                                                                                                                                                                                                                                                                                                                                                                                                                                                                                                                                                                                                                                                                                                                                                                                                                                                                                                                                                                                                                                                                                            | 30 | 50 |
| <b>16</b> | 300 | 30 | Same as previous round                                                                                                                                                                                                                                                                                                                                                                                                                                                                                                                                                                                                                                                                                                                                                                                                                                                                                                                                                                                                                                                                                                                                                                            | 30 | 50 |
| <b>17</b> | 300 | 30 | 250 $\mu\text{M}$ PRO (250 $\mu\text{L} \times 3$ ), 250 $\mu\text{M}$ LIDO (250 $\mu\text{L} \times 3$ ), 250 $\mu\text{M}$ PMZ (250 $\mu\text{L} \times 3$ ), 250 $\mu\text{M}$ CAF + QUI(250 $\mu\text{L} \times 3$ ), 250 $\mu\text{M}$ DPH (250 $\mu\text{L} \times 3$ ), 250 $\mu\text{M}$ AMP (250 $\mu\text{L} \times 3$ ), 250 $\mu\text{M}$ COC (250 $\mu\text{L} \times 3$ ), 250 $\mu\text{M}$ DOPAC + HVA (250 $\mu\text{L} \times 3$ ), 250 $\mu\text{M}$ MPD (250 $\mu\text{L} \times 3$ ), 50 $\mu\text{M}$ ALP (250 $\mu\text{L} \times 3$ ), 250 $\mu\text{M}$ PSU (250 $\mu\text{L} \times 3$ ), 250 $\mu\text{M}$ NE + EPI (250 $\mu\text{L} \times 3$ ), 250 $\mu\text{M}$ BPP (250 $\mu\text{L} \times 6$ ), 250 $\mu\text{M}$ METD + MOR (250 $\mu\text{L} \times 3$ ), 250 $\mu\text{M}$ MDPV + MDMA (250 $\mu\text{L} \times 3$ ), 250 $\mu\text{M}$ DOP (250 $\mu\text{L} \times 3$ ), 250 $\mu\text{M}$ 4-HMA (250 $\mu\text{L} \times 3$ ), 250 $\mu\text{M}$ TYM (250 $\mu\text{L} \times 3$ ), 250 $\mu\text{M}$ 4-HA (250 $\mu\text{L} \times 3$ ), 250 $\mu\text{M}$ SER (250 $\mu\text{L} \times 3$ ), 250 $\mu\text{M}$ TYR + PHE (250 $\mu\text{L} \times 3$ ) | 30 | 50 |
| <b>18</b> | 300 | 30 | Same as previous round                                                                                                                                                                                                                                                                                                                                                                                                                                                                                                                                                                                                                                                                                                                                                                                                                                                                                                                                                                                                                                                                                                                                                                            | 30 | 50 |
| <b>19</b> | 300 | 30 | 250 $\mu\text{M}$ PRO (250 $\mu\text{L} \times 3$ ), 250 $\mu\text{M}$ LIDO (250 $\mu\text{L} \times 3$ ), 250 $\mu\text{M}$ CAF + QUI(250 $\mu\text{L} \times 3$ ), 250 $\mu\text{M}$ DPH (250 $\mu\text{L} \times 3$ ), 250 $\mu\text{M}$ AMP (250 $\mu\text{L} \times 3$ ), 250 $\mu\text{M}$ COC (250 $\mu\text{L} \times 3$ ), 250 $\mu\text{M}$ DOPAC + HVA (250 $\mu\text{L} \times 3$ ), 250 $\mu\text{M}$ MPD (250 $\mu\text{L} \times 3$ ), 50 $\mu\text{M}$ ALP (250 $\mu\text{L} \times 3$ ), 250 $\mu\text{M}$ PSU (250 $\mu\text{L} \times 3$ ), 250 $\mu\text{M}$ NE + EPI (250 $\mu\text{L} \times 3$ ), 250 $\mu\text{M}$ BPP (250 $\mu\text{L} \times 6$ ), 250 $\mu\text{M}$ METD + MOR (250 $\mu\text{L} \times 3$ ), 250 $\mu\text{M}$ MDPV + MDMA (250 $\mu\text{L} \times 3$ ), 250 $\mu\text{M}$ DOP (250 $\mu\text{L} \times 3$ ), 250 $\mu\text{M}$ 4-HMA (250 $\mu\text{L} \times 3$ ), 250 $\mu\text{M}$ TYM (250 $\mu\text{L} \times 3$ ), 250 $\mu\text{M}$ 4-HA (250 $\mu\text{L} \times 3$ ), 250 $\mu\text{M}$ SER (250 $\mu\text{L} \times 3$ ), 250 $\mu\text{M}$ TYR + PHE (250 $\mu\text{L} \times 3$ )                                                      | 30 | 50 |

PRO (Procaine), LIDO (Lidocaine), CAF (Caffeine), QUI (Quinine), DPH (Diphenhydramine), AMP (Amphetamine), COC (Cocaine), DOPAC (3,4-Dihydroxyphenylacetic acid), HVA (Homovanillic acid), MPD (Methylphenidate), ALP (Alprazolam), PSU ((+)-Pseudoephedrine), NE (Norepinephrine), EPI (Epinephrine), BPP (Bupropion), METD (Methadone), MOR (Morphine), MDPV (3,4-Methylenedioxypropylvalerone), MDMA (3,4-Methylenedioxymethamphetamine), FEN (Fentanyl), DOP (Dopamine), 4-HMA (4-Hydroxymethamphetamine), TYM (Tyramine), 4-HA (4-Hydroxyamphetamine), SER (Serotonin), TYR (Tyrosine), PHE (Phenylalanine), METH ((+)-Methamphetamine).

**Table S3.** Selection strategy and conditions for the second trial of methamphetamine SELEX.

| Round     | Pool Size ( $\mu\text{mol}$ ) | Buffer Wash ( $\times$ ) | Counter-targets | Buffer Wash ( $\times$ ) | [Target] ( $\mu\text{M}$ ) |
|-----------|-------------------------------|--------------------------|-----------------|--------------------------|----------------------------|
| <b>1</b>  | 1,000                         | 10                       | None            | None                     | 500                        |
| <b>2</b>  | 300                           | 20                       | None            | None                     | 250                        |
| <b>3</b>  | 300                           | 30                       | None            | None                     | 250                        |
| <b>4</b>  | 300                           | 40                       | None            | None                     | 250                        |
| <b>5</b>  | 300                           | 50                       | None            | None                     | 250                        |
| <b>6</b>  | 300                           | 50                       | None            | None                     | 250                        |
| <b>7</b>  | 300                           | 50                       | None            | None                     | 250                        |
| <b>8</b>  | 300                           | 50                       | None            | None                     | 250                        |
| <b>9</b>  | 300                           | 50                       | None            | None                     | 250                        |
| <b>10</b> | 300                           | 50                       | None            | None                     | 250                        |
| <b>11</b> | 300                           | 50                       | None            | None                     | 250                        |

**Table S4.** Selection strategy and conditions for the third trial of methamphetamine SELEX.

| Round | Pool Size (pmol) | Buffer Wash (×) | Counter-SELEX targets                                                                                                                                                                                                                                                                                                                                                                                                                                                                                                                                                                                           | Buffer Wash (×) | [Target] (μM) |
|-------|------------------|-----------------|-----------------------------------------------------------------------------------------------------------------------------------------------------------------------------------------------------------------------------------------------------------------------------------------------------------------------------------------------------------------------------------------------------------------------------------------------------------------------------------------------------------------------------------------------------------------------------------------------------------------|-----------------|---------------|
| 1     | 1,000            | 10              | None                                                                                                                                                                                                                                                                                                                                                                                                                                                                                                                                                                                                            | None            | 500           |
| 2     | 300              | 20              | 100 μM PRO (250 μL ×3), 100 μM LIDO (250 μL ×3), 100 μM CAF (250 μL ×3), 100 μM QUI (250 μL ×3), 100 μM DPH (250 μL ×3), 100 μM AMP (250 μL ×3)                                                                                                                                                                                                                                                                                                                                                                                                                                                                 | 20              | 250           |
| 3     | 300              | 20              | 100 μM PRO (250 μL ×3), 100 μM LIDO (250 μL ×3), 100 μM CAF (250 μL ×3), 100 μM QUI (250 μL ×3), 100 μM DPH (250 μL ×3), 100 μM AMP (250 μL ×3), 100 μM DOP (250 μL ×3), 100 μM TYM (250 μL ×3), 100 μM 4-HA (250 μL ×3), 100 μM SER (250 μL ×3), 100 μM DOPAC (250 μL ×3), 100 μM HVA (250 μL ×3), 100 μM EPI (250 μL ×3)                                                                                                                                                                                                                                                                                      | 30              | 250           |
| 4     | 300              | 20              | 250 μM PRO (250 μL ×3), 250 μM LIDO (250 μL ×3), 250 μM CAF (250 μL ×3), 250 μM QUI (250 μL ×3), 250 μM DPH (250 μL ×3), 250 μM AMP (250 μL ×3), 100 μM DOP (250 μL ×3), 100 μM 4-HMA (250 μL ×3), 100 μM TYM (250 μL ×3), 100 μM 4-HA (250 μL ×3), 100 μM SER (250 μL ×3), 100 μM DOPAC (250 μL ×3), 100 μM HVA (250 μL ×3), 100 μM MPD (250 μL ×3), 100 μM ALP (250 μL ×3), 100 μM PSU (250 μL ×3), 100 μM NE (250 μL ×3), 100 μM EPI (250 μL ×3), 100 μM BPP (250 μL ×3)                                                                                                                                     | 30              | 100           |
| 5     | 300              | 24              | 250 μM PRO (250 μL ×3), 250 μM LIDO (250 μL ×3), 250 μM CAF (250 μL ×3), 250 μM QUI (250 μL ×3), 250 μM DPH (250 μL ×3), 250 μM AMP (250 μL ×3), 250 μM DOP (250 μL ×3), 250 μM 4-HMA (250 μL ×3), 250 μM TYM (250 μL ×3), 250 μM 4-HA (250 μL ×3), 250 μM SER (250 μL ×3), 250 μM DOPAC (250 μL ×3), 250 μM HVA (250 μL ×3), 100 μM MPD (250 μL ×3), 100 μM ALP (250 μL ×3), 100 μM PSU (250 μL ×3), 100 μM NE (250 μL ×3), 100 μM EPI (250 μL ×3), 100 μM BPP (250 μL ×3), 100 μM METD (250 μL ×3), 100 μM MOR (250 μL ×3), 100 μM MDPV (250 μL ×3), 100 μM MDMA (250 μL ×3), 100 μM TYR + PHE (250 μL ×3)    | 30              | 100           |
| 6     | 300              | 30              | 250 μM PRO (250 μL ×3), 250 μM LIDO (250 μL ×3), 250 μM CAF (250 μL ×3), 250 μM QUI (250 μL ×3), 250 μM DPH (250 μL ×3), 250 μM AMP (250 μL ×3), 250 μM DOP (250 μL ×3), 250 μM 4-HMA (250 μL ×3), 250 μM TYM (250 μL ×3), 250 μM 4-HA (250 μL ×3), 250 μM SER (250 μL ×3), 250 μM DOPAC (250 μL ×3), 250 μM HVA (250 μL ×3), 250 μM MPD (250 μL ×3), 100 μM ALP (250 μL ×3), 250 μM PSU (250 μL ×3), 250 μM NE (250 μL ×3), 250 μM EPI (250 μL ×3), 250 μM BPP (250 μL ×3), 250 μM METD (250 μL ×3), 250 μM MOR (250 μL ×3), 250 μM MDPV (250 μL ×3), 250 μM MDMA (250 μL ×3), 250 μM TYR + PHE (250 μL ×3)    | 30              | 100           |
| 7     | 300              | 30              | 250 μM PRO (250 μL ×3), 250 μM LIDO (250 μL ×3), 250 μM CAF (250 μL ×3), 250 μM QUI (250 μL ×3), 250 μM DPH (250 μL ×3), 250 μM AMP (250 μL ×3), 250 μM DOP (250 μL ×3), 250 μM 4-HMA (250 μL ×3), 250 μM TYM (250 μL ×3), 250 μM 4-HA (250 μL ×3), 250 μM SER (250 μL ×3), 250 μM DOPAC (250 μL ×3), 250 μM HVA (250 μL ×3), 250 μM MPD (250 μL ×3), 100 μM ALP (250 μL ×3), 250 μM PSU (250 μL ×3), 250 μM NE (250 μL ×3), 250 μM EPI (250 μL ×3), 250 μM BPP (250 μL ×6), 250 μM METD (250 μL ×3), 250 μM MOR (250 μL ×3), 250 μM MDPV (250 μL ×3), 250 μM MDMA (250 μL ×3), 250 μM TYR + PHE (250 μL ×3)    | 30              | 100           |
| 8     | 300              | 30              | 250 μM PRO (250 μL ×3), 250 μM LIDO (250 μL ×3), 250 μM CAF (250 μL ×3), 250 μM QUI (250 μL ×3), 250 μM DPH (250 μL ×3), 250 μM AMP (250 μL ×9), 250 μM DOP (250 μL ×3), 250 μM 4-HMA (250 μL ×12), 250 μM TYM (250 μL ×9), 250 μM 4-HA (250 μL ×9), 250 μM SER (250 μL ×3), 250 μM DOPAC (250 μL ×3), 250 μM HVA (250 μL ×3), 250 μM MPD (250 μL ×3), 100 μM ALP (250 μL ×3), 250 μM PSU (250 μL ×3), 250 μM NE (250 μL ×9), 250 μM EPI (250 μL ×6), 250 μM BPP (250 μL ×12), 250 μM METD (250 μL ×3), 250 μM MOR (250 μL ×3), 250 μM MDPV (250 μL ×3), 250 μM MDMA (250 μL ×12), 250 μM TYR + PHE (250 μL ×3) | 30              | 100           |
| 9     | 300              | 30              | Same as previous round                                                                                                                                                                                                                                                                                                                                                                                                                                                                                                                                                                                          | 30              | 100           |
| 10    | 300              | 30              | Same as previous round                                                                                                                                                                                                                                                                                                                                                                                                                                                                                                                                                                                          | 30              | 100           |
| 11    | 300              | 30              | Same as previous round                                                                                                                                                                                                                                                                                                                                                                                                                                                                                                                                                                                          | 30              | 100           |

|           |     |    |                                                                                                                                                                                                                                                                                                                                                                                                                                                                                                                                                                                                                  |    |     |
|-----------|-----|----|------------------------------------------------------------------------------------------------------------------------------------------------------------------------------------------------------------------------------------------------------------------------------------------------------------------------------------------------------------------------------------------------------------------------------------------------------------------------------------------------------------------------------------------------------------------------------------------------------------------|----|-----|
| <b>12</b> | 300 | 30 | Same as previous round                                                                                                                                                                                                                                                                                                                                                                                                                                                                                                                                                                                           | 30 | 100 |
| <b>13</b> | 300 | 30 | Same as previous round                                                                                                                                                                                                                                                                                                                                                                                                                                                                                                                                                                                           | 30 | 100 |
| <b>14</b> | 300 | 30 | Same as previous round                                                                                                                                                                                                                                                                                                                                                                                                                                                                                                                                                                                           | 30 | 100 |
| <b>15</b> | 300 | 30 | 250 µM PRO (250 µL ×3), 250 µM LIDO (250 µL ×3), 250 µM CAF (250 µL ×3), 250 µM QUI (250 µL ×3), 250 µM DPH (250 µL ×3), 250 µM AMP (250 µL ×12), 250 µM DOP (250 µL ×3), 250 µM 4-HMA (250 µL ×12), 250 µM TYM (250 µL ×9), 250 µM 4-HA (250 µL ×9), 250 µM SER (250 µL ×3), 250 µM DOPAC (250 µL ×3), 250 µM HVA (250 µL ×3), 250 µM MPD (250 µL ×3), 100 µM ALP (250 µL ×3), 250 µM PSU (250 µL ×3), 250 µM NE (250 µL ×9), 250 µM EPI (250 µL ×6), 250 µM BPP (250 µL ×12), 250 µM METD (250 µL ×3), 250 µM MOR (250 µL ×3), 250 µM MDPV (250 µL ×3), 250 µM MDMA (250 µL ×16), 250 µM TYR + PHE (250 µL ×3) | 30 | 100 |
| <b>16</b> | 300 | 30 | 250 µM PRO (250 µL ×3), 250 µM LIDO (250 µL ×3), 250 µM CAF (250 µL ×3), 250 µM QUI (250 µL ×3), 250 µM DPH (250 µL ×3), 250 µM AMP (250 µL ×16), 250 µM DOP (250 µL ×3), 250 µM 4-HMA (250 µL ×12), 250 µM TYM (250 µL ×9), 250 µM 4-HA (250 µL ×9), 250 µM SER (250 µL ×3), 250 µM DOPAC (250 µL ×3), 250 µM HVA (250 µL ×3), 250 µM MPD (250 µL ×3), 100 µM ALP (250 µL ×3), 250 µM PSU (250 µL ×3), 250 µM NE (250 µL ×9), 250 µM EPI (250 µL ×6), 250 µM BPP (250 µL ×12), 250 µM METD (250 µL ×3), 250 µM MOR (250 µL ×3), 250 µM MDPV (250 µL ×3), 250 µM MDMA (250 µL ×16), 250 µM TYR + PHE (250 µL ×3) | 30 | 100 |
| <b>17</b> | 300 | 30 | Same as previous round                                                                                                                                                                                                                                                                                                                                                                                                                                                                                                                                                                                           | 30 | 100 |
| <b>18</b> | 300 | 30 | Same as previous round                                                                                                                                                                                                                                                                                                                                                                                                                                                                                                                                                                                           | 30 | 100 |

PRO (Procaine), LIDO (Lidocaine), CAF (Caffeine), QUI (Quinine), DPH (Diphenhydramine), AMP (Amphetamine), DOPAC (3,4-Dihydroxyphenylacetic acid), HVA (Homovanillic acid), MPD (Methylphenidate), ALP (Alprazolam), PSU ((+)-Pseudoephedrine), NE (Norepinephrine), EPI (Epinephrine), BPP (Bupropion), METD (Methadone), MOR (Morphine), MDPV (3,4-Methylenedioxypropylamphetamine), MDMA (3,4-Methylenedioxymethamphetamine), DOP (Dopamine), 4-HMA (4-Hydroxy methamphetamine), TYM (Tyramine), 4-HA (4-Hydroxy amphetamine), SER (Serotonin), TYR (Tyrosine), PHE (Phenylalanine), METH ((+)-Methamphetamine).

**Table S5.** Selection strategy and conditions for the fourth trial of methamphetamine SELEX.

| Round | Pool Size (pmol) | Buffer Wash (×) | Counter-SELEX targets                                                                                                                                                                                                                                                                                                                                                                                                                                                                                                                                                                                                          | Buffer Wash (×) | Last 3 Washes | [Target] (μM) |
|-------|------------------|-----------------|--------------------------------------------------------------------------------------------------------------------------------------------------------------------------------------------------------------------------------------------------------------------------------------------------------------------------------------------------------------------------------------------------------------------------------------------------------------------------------------------------------------------------------------------------------------------------------------------------------------------------------|-----------------|---------------|---------------|
| 1     | 1,000            | 9               | None                                                                                                                                                                                                                                                                                                                                                                                                                                                                                                                                                                                                                           | None            |               | 500           |
| 2     | 300              | 20              | 100 μM PRO (250 μL ×3), 100 μM LIDO (250 μL ×3), 100 μM CAF (250 μL ×3), 100 μM QUI (250 μL ×3), 100 μM DPH (250 μL ×3), 100 μM AMP (250 μL ×6), 100 μM BPP (250 μL ×6), 100 μM MDMA (250 μL ×6)                                                                                                                                                                                                                                                                                                                                                                                                                               | 17              |               | 250           |
| 3     | 300              | 20              | 100 μM PRO (250 μL ×3), 100 μM LIDO (250 μL ×3), 100 μM CAF (250 μL ×3), 100 μM QUI (250 μL ×3), 100 μM DPH (250 μL ×3), 100 μM AMP (250 μL ×6), 100 μM BPP (250 μL ×6), 100 μM MDMA (250 μL ×6), 100 μM 4-HMA (250 μL ×6), 100 μM NE (250 μL ×6), 100 μM EPI (250 μL ×6), 100 μM DOP (250 μL ×3), 100 μM TYM (250 μL ×3), 100 μM 4-HA (250 μL ×3), 100 μM TYR (250 μL ×3)                                                                                                                                                                                                                                                     | 27              |               | 250           |
| 4     | 300              | 20              | 250 μM PRO (250 μL ×3), 250 μM LIDO (250 μL ×3), 250 μM CAF (250 μL ×3), 100 μM QUI (250 μL ×3), 250 μM DPH (250 μL ×3), 100 μM AMP (250 μL ×6), 100 μM BPP (250 μL ×6), 100 μM MDMA (250 μL ×6), 100 μM 4-HMA (250 μL ×6), 100 μM NE (250 μL ×6), 100 μM EPI (250 μL ×6), 100 μM DOP (250 μL ×3), 100 μM TYM (250 μL ×3), 100 μM 4-HA (250 μL ×3), 100 μM TYR (250 μL ×3), 100 μM MPD (250 μL ×3), 100 μM ALP (250 μL ×3), 100 μM PSU (250 μL ×3), 100 μM METD (250 μL ×3), 100 μM MOR (250 μL ×3), 100 μM MDPV (250 μL ×3), 100 μM PHE (250 μL ×3), 100 μM SER (250 μL ×3), 100 μM DOPAC (250 μL ×3), 100 μM HVA (250 μL ×3) | 27              | w/o Triton    | 250           |
| 5     | 300              | 24              | 250 μM PRO (250 μL ×3), 250 μM LIDO (250 μL ×3), 250 μM CAF (250 μL ×3), 100 μM QUI (250 μL ×3), 250 μM DPH (250 μL ×3), 250 μM AMP (250 μL ×6), 250 μM BPP (250 μL ×6), 250 μM MDMA (250 μL ×6), 250 μM 4-HMA (250 μL ×6), 250 μM NE (250 μL ×6), 250 μM EPI (250 μL ×6), 250 μM DOP (250 μL ×3), 250 μM TYM (250 μL ×3), 250 μM 4-HA (250 μL ×3), 250 μM TYR (250 μL ×3), 250 μM MPD (250 μL ×3), 100 μM ALP (250 μL ×3), 250 μM PSU (250 μL ×3), 250 μM METD (250 μL ×3), 250 μM MOR (250 μL ×3), 250 μM MDPV (250 μL ×3), 250 μM PHE (250 μL ×3), 250 μM SER (250 μL ×3), 250 μM DOPAC (250 μL ×3), 250 μM HVA (250 μL ×3) | 27              |               | 100           |
| 6     | 300              | 30              | Same as previous round                                                                                                                                                                                                                                                                                                                                                                                                                                                                                                                                                                                                         | 27              |               | 100           |
| 7     | 300              | 30              | Same as previous round                                                                                                                                                                                                                                                                                                                                                                                                                                                                                                                                                                                                         | 27              |               | 100           |
| 8     | 300              | 30              | Same as previous round                                                                                                                                                                                                                                                                                                                                                                                                                                                                                                                                                                                                         | 27              |               | 100           |
| 9     | 300              | 30              | Same as previous round                                                                                                                                                                                                                                                                                                                                                                                                                                                                                                                                                                                                         | 27              |               | 100           |
| 10    | 300              | 30              | Same as previous round                                                                                                                                                                                                                                                                                                                                                                                                                                                                                                                                                                                                         | 27              |               | 100           |
| 11    | 300              | 30              | Same as previous round                                                                                                                                                                                                                                                                                                                                                                                                                                                                                                                                                                                                         | 27              |               | 100           |
| 12    | 300              | 30              | Same as previous round                                                                                                                                                                                                                                                                                                                                                                                                                                                                                                                                                                                                         | 27              |               | 100           |
| 13    | 300              | 30              | Same as previous round                                                                                                                                                                                                                                                                                                                                                                                                                                                                                                                                                                                                         | 27              |               | 100           |

PRO (Procaine), LIDO (Lidocaine), CAF (Caffeine), QUI (Quinine), DPH (Diphenhydramine), AMP (Amphetamine), DOPAC (3,4-Dihydroxyphenylacetic acid), HVA (Homovanillic acid), MPD (Methylphenidate), ALP (Alprazolam), PSU ((+)-Pseudoephedrine), NE (Norepinephrine), EPI (Epinephrine), BPP (Bupropion), METD (Methadone), MOR (Morphine), MDPV (3,4-Methylenedioxypropylvalerone), MDMA (3,4-Methylenedioxymethamphetamine), DOP (Dopamine), 4-HMA (4-Hydroxy methamphetamine), TYM (Tyramine), 4-HA (4-Hydroxy amphetamine), SER (Serotonin), TYR (Tyrosine), PHE (Phenylalanine), METH ((+)-Methamphetamine).

**Table S6.** Summary HTS statistics for methamphetamine-binding aptamer selection from Trials 1–4.

| <b>Pool</b>          | <b>Total Reads</b> | <b>Filtered Reads</b> | <b>Unique Sequences</b> | <b>Unique Sequences (%)</b> |
|----------------------|--------------------|-----------------------|-------------------------|-----------------------------|
| <b>SELEX Trial 1</b> |                    |                       |                         |                             |
| Round 13             | 462,902            | 436,550               | 189,869                 | 43.5                        |
| Round 19             | 466,542            | 441,260               | 189,018                 | 42.8                        |
| <b>SELEX Trial 2</b> |                    |                       |                         |                             |
| Round 9              | 533,226            | 477,697               | 185,314                 | 38.8                        |
| Round 11             | 449,060            | 384,057               | 82,997                  | 21.6                        |
| <b>SELEX Trial 3</b> |                    |                       |                         |                             |
| Round 7              | 382,954            | 366,805               | 170,657                 | 46.5                        |
| Round 13             | 1,345,800          | 1,236,714             | 381,431                 | 30.8                        |
| Round 18             | 1,269,964          | 1,159,331             | 216,220                 | 18.7                        |
| <b>SELEX Trial 4</b> |                    |                       |                         |                             |
| Round 9              | 431,950            | 392,633               | 172,750                 | 44.0                        |
| Round 10             | 498,324            | 447,146               | 183,069                 | 40.9                        |
| Round 11             | 504,238            | 460,649               | 147,713                 | 32.1                        |
| Round 13             | 515,898            | 476,413               | 45,953                  | 9.6                         |
| Round 14             | 407,918            | 389,749               | 28,394                  | 7.3                         |
| Round 15             | 409,406            | 396,736               | 17,791                  | 4.5                         |



**Table S7.** Summary of ITC experimental conditions and measurements for methamphetamine aptamer sequences.

| Name                 | Titration time | $\Delta H$ (kcal/mol) | $\Delta S$ (cal/mol·K) | $K_D$ ( $\mu M$ ) | Titration time | $\Delta H$ (kcal/mol) | $\Delta S$ (cal/mol·K) | $K_D$ ( $\mu M$ ) |
|----------------------|----------------|-----------------------|------------------------|-------------------|----------------|-----------------------|------------------------|-------------------|
| (+) -Methamphetamine |                |                       |                        |                   | Amphetamine    |                       |                        |                   |
| <b>SELEX Trial 1</b> |                |                       |                        |                   |                |                       |                        |                   |
| MT1-R1               | 1×             | N/A                   | N/A                    | N/A               | -              | -                     | -                      | -                 |
| MT1-R2               | 1×             | N/A                   | N/A                    | N/A               | -              | -                     | -                      | -                 |
| MT1-R3               | 1×             | N/A                   | N/A                    | N/A               | -              | -                     | -                      | -                 |
| MT1-R4               | 1×             | N/A                   | N/A                    | N/A               | -              | -                     | -                      | -                 |
| MT1-R5               | 1×             | N/A                   | N/A                    | N/A               | -              | -                     | -                      | -                 |
| <b>SELEX Trial 2</b> |                |                       |                        |                   |                |                       |                        |                   |
| MT2-R1               | 1×             | -14.9                 | -24.7                  | 2.5 ± 0.1         | 1×             | -14.8                 | -25.9                  | 5.7 ± 0.2         |
| MT2-R2               | 1×             | -20.9                 | -46.2                  | 5.0 ± 0.1         | -              | -                     | -                      | -                 |
| MT2-R3               | 1×             | -6.8                  | -1.3                   | 18.0 ± 1.1        | -              | -                     | -                      | -                 |
| MT2-R4               | 1×             | -6.1                  | 2.3                    | 10.1 ± 0.7        | -              | -                     | -                      | -                 |
| <b>SELEX Trial 3</b> |                |                       |                        |                   |                |                       |                        |                   |
| M1                   | 1×             | -10.3                 | -10.7                  | 5.1 ± 0.5         | 1×             | -12.4                 | -18.8                  | 9.1 ± 0.5         |
| M2                   | 1×             | -9.9                  | -8.5                   | 3.6 ± 0.3         | 1×             | -11.1                 | -13.6                  | 6.6 ± 0.4         |
| M3                   | 1×             | -12.5                 | -17.9                  | 4.9 ± 0.5         | 1×             | -4.8                  | 2.5                    | 78.5 ± 4.7        |
| M4                   | 1×             | -9.2                  | -8.9                   | 12.4 ± 0.8        | 1×             | -9.0                  | -9.1                   | 22.9 ± 1.5        |
| M5                   | 1×             | -6.2                  | 3.2                    | 5.3 ± 0.5         | 1×             | -2.5                  | 10.9                   | 56.4 ± 3.2        |
| M6                   | 1×             | -12.1                 | -16.4                  | 4.4 ± 0.2         | 1×             | -11.8                 | -15.9                  | 6.4 ± 0.2         |
| M7                   | 1×             | -8.6                  | -5.7                   | 6.0 ± 0.5         | 1×             | -4.1                  | 7.0                    | 27.2 ± 1.1        |
| M8                   | 1×             | -6.5                  | 1.3                    | 8.5 ± 0.8         | 1×             | -3.7                  | 9.0                    | 19.3 ± 1.5        |
| M9                   | 1×             | -8.3                  | -4.1                   | 6.1 ± 0.4         | 1×             | -7.1                  | -5.6                   | 89.1 ± 6.2        |
| M11                  | 1×             | -20.7                 | -46.7                  | 8.9 ± 0.1         | 2×             | -6.9                  | -5.7                   | 127 ± 6.8         |
| M12                  | 1×             | -14.3                 | -24.8                  | 7.5 ± 0.2         | 2×             | -19.2                 | -47.3                  | 171 ± 16.1        |
| M13                  | 1×             | -10.1                 | -8.9                   | 3.3 ± 0.1         | 1×             | -4.6                  | 5.9                    | 20.0 ± 0.9        |
| M14                  | 1×             | -14.5                 | -24.1                  | 3.7 ± 0.2         | 1×             | -12.9                 | -20.0                  | 7.6 ± 0.5         |
| M18                  | 1×             | -7.0                  | -0.1                   | 7.0 ± 0.6         | 1×             | -3.1                  | 8.9                    | 60.3 ± 3.9        |
| M20                  | 1×             | -6.8                  | 0.7                    | 6.4 ± 0.3         | 2×             | -2.9                  | 9.6                    | 60.6 ± 2.9        |
| M21                  | 1×             | -6.7                  | 0.8                    | 6.9 ± 0.3         | 2×             | -3.5                  | 7.1                    | 70.8 ± 3.1        |
| <b>SELEX Trial 4</b> |                |                       |                        |                   |                |                       |                        |                   |
| ML1                  | 1×             | -42.8                 | -119.2                 | 3.3 ± 0.1         | 1×             | -27.4                 | -73.6                  | 67.2 ± 1.1        |
| ML2                  | 1×             | -31.4                 | -81.4                  | 4.4 ± 0.2         | 1×             | -15.2                 | -31.5                  | 45.3 ± 1.3        |
| ML3                  | 1×             | -12.7                 | -16.2                  | 1.5 ± 0.1         | 2×             | -4.8                  | 2.4                    | 80.6 ± 3.1        |
| ML4                  | 1×             | -19.2                 | -39.2                  | 2.5 ± 0.1         | 2×             | -9.1                  | -12.7                  | 117 ± 4.1         |
| ML5                  | 1×             | -13.1                 | -17.8                  | 1.6 ± 0.1         | 1×             | -10.9                 | -12.7                  | 5.25 ± 0.3        |
| ML6                  | 1×             | -41.6                 | -114.5                 | 2.1 ± 0.1         | 1×             | -25.0                 | -64.1                  | 40.5 ± 0.6        |
| ML7                  | 1×             | -24.6                 | -56.0                  | 1.3 ± 0.1         | 1×             | -12.7                 | -21.1                  | 18.0 ± 0.6        |
| ML8                  | 1×             | -9.8                  | -9.8                   | 8.0 ± 0.4         | 1×             | -6.7                  | -2.7                   | 43.7 ± 1.8        |
| ML10                 | 1×             | -40.0                 | -109.0                 | 1.9 ± 0.1         | 1×             | -25.0                 | -64.5                  | 43.0 ± 1.6        |
| ML11                 | 1×             | -43.0                 | -119.5                 | 2.4 ± 0.1         | 1×             | -25.6                 | -66.5                  | 46.6 ± 0.7        |
| ML12                 | 1×             | -7.2                  | -0.3                   | 5.7 ± 0.3         | 1×             | -8.4                  | -6.7                   | 18.2 ± 0.5        |
| ML13                 | 1×             | -34.5                 | -92.9                  | 7.0 ± 0.4         | 2×             | -24.5                 | -65.2                  | 140 ± 3.9         |

**Table S8.** ITC results and conditions for determining affinity of methamphetamine aptamer sequences.

| Aptamer  | [Aptamer]<br>( $\mu\text{M}$ ) | [(+)-METH]<br>( $\mu\text{M}$ ) | $\Delta\text{H}$<br>(kcal/mol) | $\Delta\text{S}$<br>(cal/mol·K) | $K_D$<br>( $\mu\text{M}$ ) | Buffer                                                       |
|----------|--------------------------------|---------------------------------|--------------------------------|---------------------------------|----------------------------|--------------------------------------------------------------|
| ML3      | 50                             | 1500                            | -20.0                          | -47                             | $34.3 \pm 1.9$             | 0.5× PBS, 1 mM<br>MgCl <sub>2</sub> , 0.005%<br>Triton X-100 |
|          | 50                             | 1250                            | -13.5                          | -23                             | $9.9 \pm 0.6$              | 0.5× PBS, 2 mM<br>MgCl <sub>2</sub> , 0.005%<br>Triton X-100 |
|          | 20                             | 500                             | -12.7                          | -16                             | $1.5 \pm 0.1$              | 0.5× PBS, 5 mM<br>MgCl <sub>2</sub> , 0.005%<br>Triton X-100 |
| ML4      | 50                             | 1500                            | -47.4                          | -141                            | $65.2 \pm 1.8$             | 0.5× PBS, 1 mM<br>MgCl <sub>2</sub> , 0.005%<br>Triton X-100 |
|          | 50                             | 1250                            | -22.2                          | -53                             | $16.2 \pm 0.5$             | 0.5× PBS, 2 mM<br>MgCl <sub>2</sub> , 0.005%<br>Triton X-100 |
|          | 20                             | 500                             | -19.2                          | -39                             | $2.5 \pm 0.1$              | 0.5× PBS, 5 mM<br>MgCl <sub>2</sub> , 0.005%<br>Triton X-100 |
| ML3-mut1 | 50                             | 2000                            | -4.4                           | 0.5                             | $408 \pm 16$               | 0.5× PBS, 5 mM<br>MgCl <sub>2</sub> , 0.005%<br>Triton X-100 |
| ML3-mut2 | 50                             | 2000                            | -5.4                           | 2.1                             | $39.0 \pm 1.8$             |                                                              |
| ML3-mut3 | 50                             | 2000                            | -10.9                          | -10                             | $1.4 \pm 0.1$              |                                                              |
| ML3-mut4 | 50                             | 2000                            | -5.1                           | 1.6                             | $72.5 \pm 3.1$             |                                                              |
| ML3-mut5 | 50                             | 2000                            | NA                             | NA                              | NA                         |                                                              |
| ML3-mut6 | 50                             | 2000                            | NA                             | NA                              | NA                         |                                                              |
| ML4-mut1 | 50                             | 2000                            | -9.9                           | -14                             | $67.1 \pm 4.1$             | 0.5× PBS, 5 mM<br>MgCl <sub>2</sub> , 0.005%<br>Triton X-100 |
| ML4-mut2 | 50                             | 2000                            | -12.1                          | -16                             | $4.0 \pm 0.1$              |                                                              |
| ML4-mut3 | 50                             | 2000                            | -15.2                          | -26                             | $3.2 \pm 0.1$              |                                                              |
| ML4-mut4 | 50                             | 2000                            | -16.2                          | -30                             | $4.9 \pm 0.2$              |                                                              |
| ML4-mut5 | 50                             | 2000                            | -16.5                          | -31                             | $3.3 \pm 0.1$              |                                                              |
| ML4-mut6 | 50                             | 2000                            | -14.6                          | -24                             | $3.8 \pm 0.1$              |                                                              |
| ML4-mut7 | 50                             | 2000                            | -8.4                           | -9                              | $64.3 \pm 3.9$             |                                                              |

**Table S9.** List of methamphetamine aptamer sequences used in this work.

| <b>Aptamer Name</b>  | <b>Sequence (5' – 3')</b>                                                                |
|----------------------|------------------------------------------------------------------------------------------|
| 84-nt aptaMETH       | ACTGGAGCTCAATCAGTACACGACGGTTGCAAGTGGGACTCTGGTAGGCTGGGTTAATTTGGGACAAGCT<br>TCAACCATGGAGTA |
| 38-nt aptaMETH       | ACGGTTGCAAGTGGGACTCTGGTAGGCTGGGTTAATTTGG                                                 |
| Aptamer-2            | AGGAATTCAGATCTCCCTGCAGGTGGTGTTTTTTTTTGTGTGCTGTGTTTTTTGTGATGCATGCTCGAGGAGC<br>TCAGGATCCCC |
| Apta-4               | ATACGAGCTTGTCAATAGCGTTTCTATCTGGCTGTATCGTGATAGTAAGAGCACTAATGATAGTAAGAGCA<br>ATC           |
| <b>SELEX Trial 1</b> |                                                                                          |
| MT1-R1               | GGGACGACCCCAATTAGTGGTGCCGGGTGTTTATGGTGCCTCGTCCC                                          |
| MT1-R2               | GGGACGACCACTTTGGGCAGGTAGGTTGGGCAAGTAGTGTCTGCC                                            |
| MT1-R3               | GGGACGACCCAGTTGGGTAGGTATGGTTGGGCACGGTGGTCTGCC                                            |
| MT1-R4               | GGGACGACGGCACGGTTAGCATGGCTGTATTTGTGTAGGTCGTCCC                                           |
| MT1-R5               | GGGACGACCACGGTTAAAGTAGCACTTGTATTGGGTGCTCGTCCC                                            |
| <b>SELEX Trial 2</b> |                                                                                          |
| MT2-R1               | GGGACGACGCTAGGGGATCTTTTGGGGTTTGTATGGGCGTCTGCC                                            |
| MT2-R2               | GGGACGACGAGGGGATCCATCCAATGGGGTTTGTATACGTCGTCCC                                           |
| MT2-R3               | GGGACGACGGTACCCGCCGGTGCAGGATCTGGGGTGGTGTCTGCC                                            |
| MT2-R4               | GGGACGACGGCAATTGCCGGTGCAGGATCTGAATTATCGTCGTCCC                                           |
| <b>SELEX Trial 3</b> |                                                                                          |
| M1                   | GGGACGACGGGATGGTAAAGTGGTAGGTCGTTGGAATTTCTACTGTATCGTCTGCC                                 |
| M2                   | GGGACGACGGGACGGTAAAGTGGTAGGTCGTTGGAATTTCTACTGTATCGTCTGCC                                 |
| M3                   | GGGACGACCGTCCGAGTTTATAGGAGTGGTTGCATTGCGCTGGGAAGAGGTCGTCCC                                |
| M4                   | GGGACGACGCACTATGGCTAGGGTTGGTACGGTCGTGAACCGCGGGGTGTCGTCCC                                 |
| M5                   | GGGACGACGGCACGGGTTATTCGTTGGTTGCACTGCGCTGGGAGGCAGTCGTCCC                                  |
| M6                   | GGGACGACGGGATGGTAAAGTGGCAGGTCGTTGGAATTTCTACTGTATCGTCTGCC                                 |
| M7                   | GGGACGACGGCACGAGGTTATTCGTTGGTTGCACTGCGCTGGGAGGTAGTCGTCCC                                 |
| M8                   | GGGACGACGGGGCTCTTACCCTGGAGGGTAGAAGGGGAGGTGTGGTCAGTCGTCCC                                 |
| M9                   | GGGACGACGGCACGTGGTTATTCGTTGGTTGCACTGCGCTGGGAGGCAGTCGTCCC                                 |
| M11                  | GGGACGACCGGCTGTCTGGATGCATTGCGCCGGAACTCGGACGGATGGTCTGTCCC                                 |
| M12                  | GGGACGACCGTCCGAGTTATAGGAGTGGTTGCATTGCGCTGGGAAGAGGTCGTCCC                                 |
| M13                  | GGGACGACGGCACGAGGTTATTCGTTGGTTGCACTGCGCTGGGAGGAAGTCGTCCC                                 |
| M14                  | GGGACGACGGGACGGTAAAGTGGCAGGTCGTTGGAATTTCTACTGTATCGTCTGCC                                 |
| M18                  | GGGACGACGGCACGAGGTTATTCGTTGGTTGCACTGCGCTGGGAGGCAGTCGTCCC                                 |
| M20                  | GGGACGACGGCACGAGGTTAATCGTTGGTTGCACTGCGCTGGGAGGCAGTCGTCCC                                 |
| M21                  | GGGACGACGGCACGAGGTTAATTCGTTGGTTGCACTGCGCTGGGAGGCAGTCGTCCC                                |
| <b>SELEX Trial 4</b> |                                                                                          |
| ML1                  | TTCAAATCTGAGCAGCCTAGTTACTGACGGGTTTATAGTACTCGCATTGAGTCTAGATTTGAA                          |
| ML2                  | TTCAAATCTGGTGCCCTTTCGCAGTCGGTTGGTAATGAGACCACTTTAGAGTCTAGATTTGAA                          |
| ML3                  | TTCAAATCTTATGTACGTTCTATCGCATGGATGGGATTTTGGGTTACCTAGTCTAGATTTGAA                          |
| ML4                  | TTCAAATCTTGGTACGTTCTGCCTTTTCTATTTTGTCTTGGGTTACCTAGTCTAGATTTGAA                           |
| ML5                  | TTCAAATCTATGGTGCAGTGCAGGGACGGAGGTAAACATGAGTTTTAGTCTAGATTTGAA                             |
| ML6                  | TTCAAATCTGAGCAGCCTAGTTACTGACGGGTTTATAGTACTCGCATCGAGTCTAGATTTGAA                          |
| ML7                  | TTCAAATCTGGTGCCCTTTCGCAGTCGGTTGGTAATGAGATCACTTTAGAGTCTAGATTTGAA                          |
| ML8                  | TTCAAATCTCCACGCTGGACTGGATGCAATGCGCCGGGATATCGTCTAAAGTCTAGATTTGAA                          |
| ML10                 | TTCAAATCTGAGCAGCCTAGTTACTGACGGGTTTATAGTACTCACATTGAGTCTAGATTTGAA                          |
| ML11                 | TTCAAATCTGAGCAGCCTAGTTACTGACGGGTTTATAGTACTCGTATTGAGTCTAGATTTGAA                          |
| ML12                 | TTCAAATCTGCGGCGACTAATTCCTAGTGGTGGTTGCAATGCGCTGGGATGAGTCTAGATTTGAA                        |
| ML13                 | TTCAAATCTGAGCAGCCTAGTTACTGACGGGTTTATAGTACTCGCACTGAGTCTAGATTTGAA                          |

**Table S10.** List of point-mutant sequences of methamphetamine aptamer used in this work.

| Name     | Sequence (5' – 3')                                                 |
|----------|--------------------------------------------------------------------|
| ML3-mut1 | TTCAAATCTTATGTAAGTTCTATCGCATGGATGGGATTTGGGTTACCTAGTCTAGATTTGAA     |
| ML3-mut2 | TTCAAATCTTATGTACGTAAGTTCTATCGCATGGATGGGATTTGGGTTACCTAGTCTAGATTTGAA |
| ML3-mut3 | TTCAAATCTTATGTACGTTCTATCGCATGGATGTGATTTGGGTTACCTAGTCTAGATTTGAA     |
| ML3-mut4 | TTCAAATCTTATGTACGTTCTATCGCATGGATGGGATTAAGTTGGGTTACCTAGTCTAGATTTGAA |
| ML3-mut5 | TTCAAATCTTATGTACGTTCTATCGCATGGATGGGATTTTGGTTACCTAGTCTAGATTTGAA     |
| ML3-mut6 | TTCAAATCTTATGTACGTTCTATCGCATGGATGGGATTTGGGTTACCAAGTCTAGATTTGAA     |
| ML4-mut1 | TTCAAATCTTGGTACGTAAGTGCCTTTTCTTATTTGCTTTGGGTTACCTAGTCTAGATTTGAA    |
| ML4-mut2 | TTCAAATCTTGGTACGTTCTGCATTTTCTTATTTGCTTTGGGTTACCTAGTCTAGATTTGAA     |
| ML4-mut3 | TTCAAATCTTGGTACGTTCTGCCTATTCTTATTTGCTTTGGGTTACCTAGTCTAGATTTGAA     |
| ML4-mut4 | TTCAAATCTTGGTACGTTCTGCCTTTACTTATTTGCTTTGGGTTACCTAGTCTAGATTTGAA     |
| ML4-mut5 | TTCAAATCTTGGTACGTTCTGCCTTTTCTTATATTGCTTTGGGTTACCTAGTCTAGATTTGAA    |
| ML4-mut6 | TTCAAATCTTGGTACGTTCTGCCTTTTCTTATTTAGCTTTGGGTTACCTAGTCTAGATTTGAA    |
| ML4-mut7 | TTCAAATCTTGGTACGTTCTGCCTTTTCTTATTTGCTAAGTTGGGTTACCTAGTCTAGATTTGAA  |

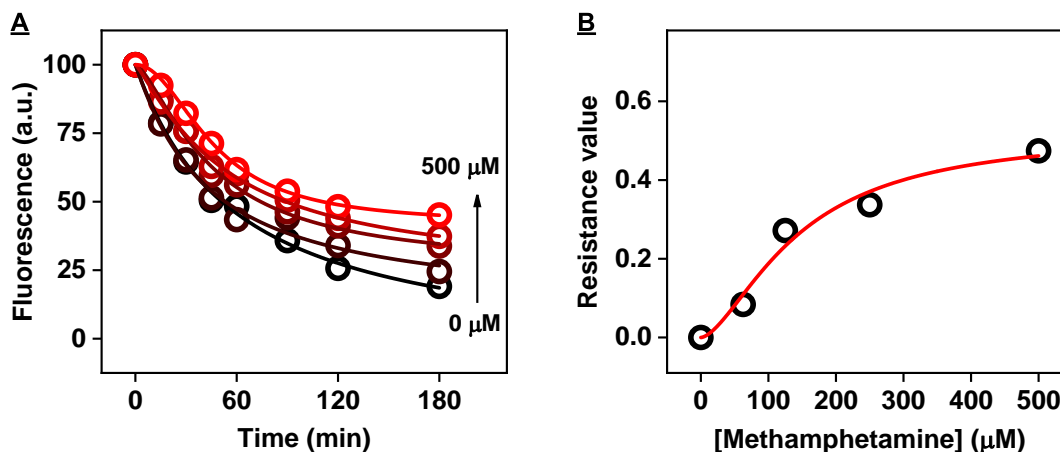

**Figure S1.** Assessing the binding of aptaMETH to (+)-methamphetamine using the exonuclease digestion assay in their reported selection buffer. (A) Time-course of aptaMETH digestion in the absence or presence of various concentrations (0–500  $\mu\text{M}$ ) of (+)-methamphetamine. The y-axis represents normalized fluorescence. (B) Resistance to exonuclease digestion is plotted as a function of target concentration. The data was fitted with the Hill equation.

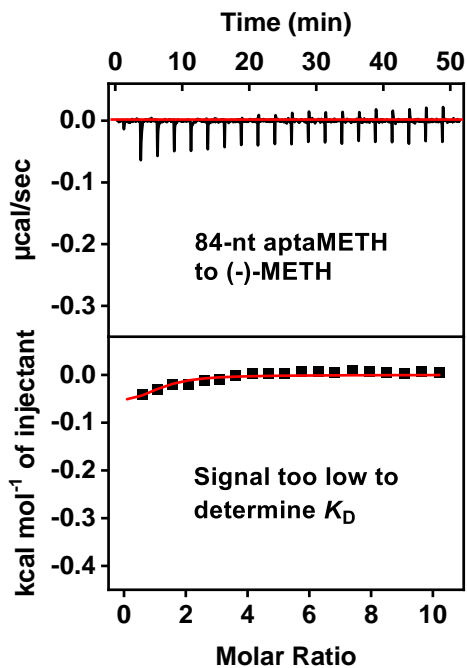

**Figure S2.** Binding affinity of aptaMETH for (-)-methamphetamine based on isothermal titration calorimetry (ITC) in their reported selection buffer. Top panel displays the heat generated from each titration of (-)-methamphetamine into aptaMETH. Bottom panel shows the integrated heat of each titration after correcting for the heat of dilution of the titrant. While the aptamer shows some degree of binding to this ligand, the signal to noise ratio is too low to quantify this affinity.

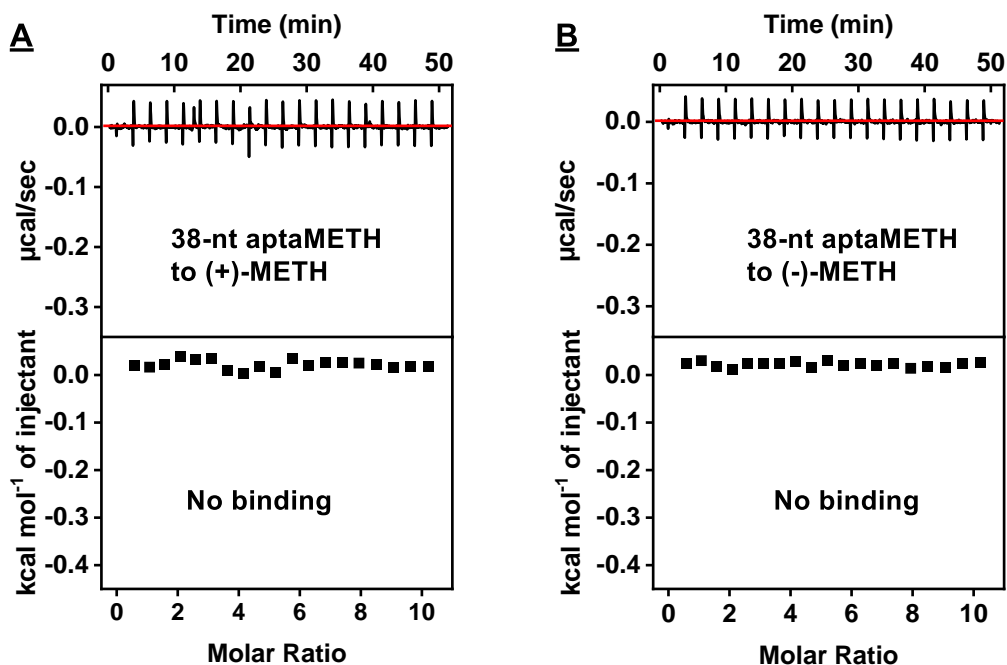

**Figure S3.** Binding affinity of 38-nt aptaMETH to methamphetamine based on ITC in their reported selection buffer. Top panels display the heat generated from each titration of (A) (+)-methamphetamine or (B) (-)-methamphetamine into 38-nt aptaMETH. Bottom panels show the integrated heat of each titration after correcting for the heat of dilution of the titrant.

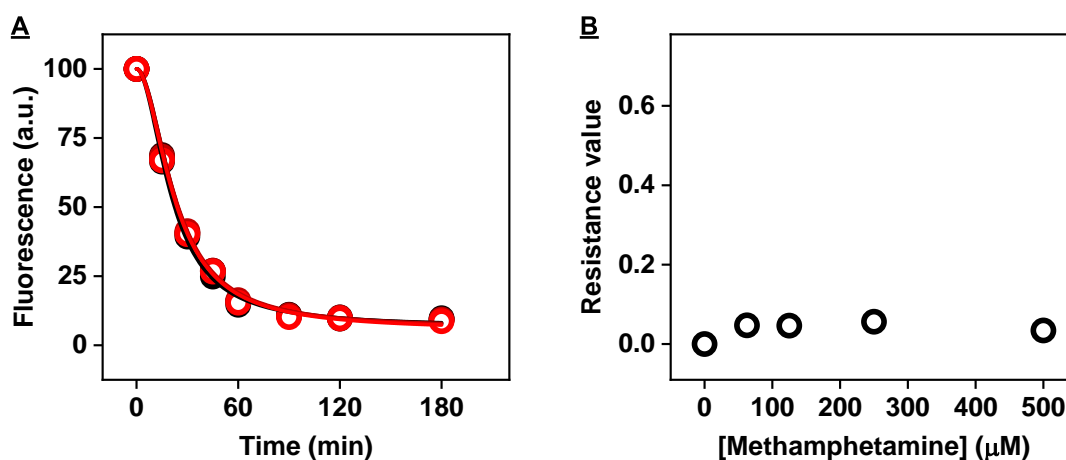

**Figure S4.** Assessing binding of Aptamer-2 to (+)-methamphetamine using the exonuclease digestion assay in their reported selection buffer. (A) Time-course plot of exonuclease digestion of Aptamer-2 in the absence or presence of 0–500  $\mu\text{M}$  (+)-methamphetamine. The y-axis represents normalized fluorescence. (B) Resistance to digestion was plotted as a function of target concentration. The data were fitted with the Hill equation.

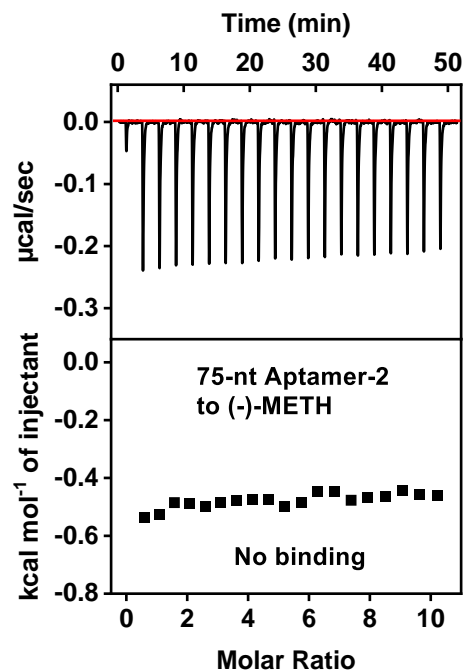

**Figure S5.** Binding affinity of Aptamer-2 for (-)-methamphetamine based on ITC in their reported selection buffer. Top panel displays the heat generated from each titration of (-)-methamphetamine into Aptamer-2. Bottom panel shows the integrated heat of each titration after correcting for the heat of dilution of the titrant.

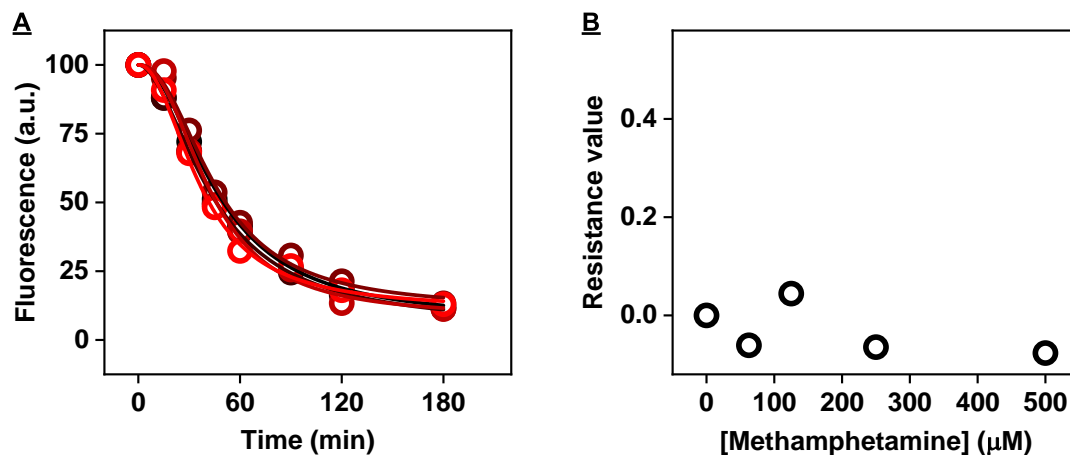

**Figure S6.** Assessing binding of Apta-4 to (+)-methamphetamine using the exonuclease digestion assay in their reported selection buffer. (A) Time-course of exonuclease digestion of Apta-4 in the absence or presence of 0–500  $\mu\text{M}$  of (+)-methamphetamine. The y-axis represents normalized fluorescence. (B) Resistance to digestion is plotted as a function of target concentration. The data were fitted with the Hill equation.

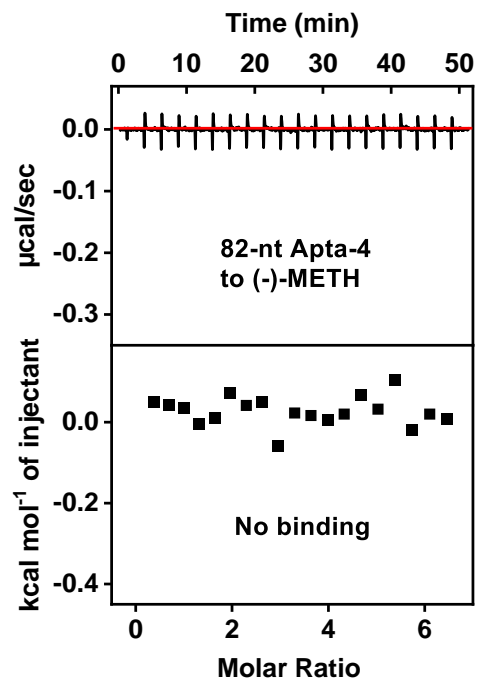

**Figure S7.** Binding affinity of Apta-4 for (-)-methamphetamine using ITC in their reported selection buffer. Top panel displays the heat generated from each titration of 950  $\mu\text{M}$  (-)-methamphetamine into 30  $\mu\text{M}$  Apta-4. Bottom panel shows the integrated heat of each titration after correcting for the heat of dilution of the titrant.



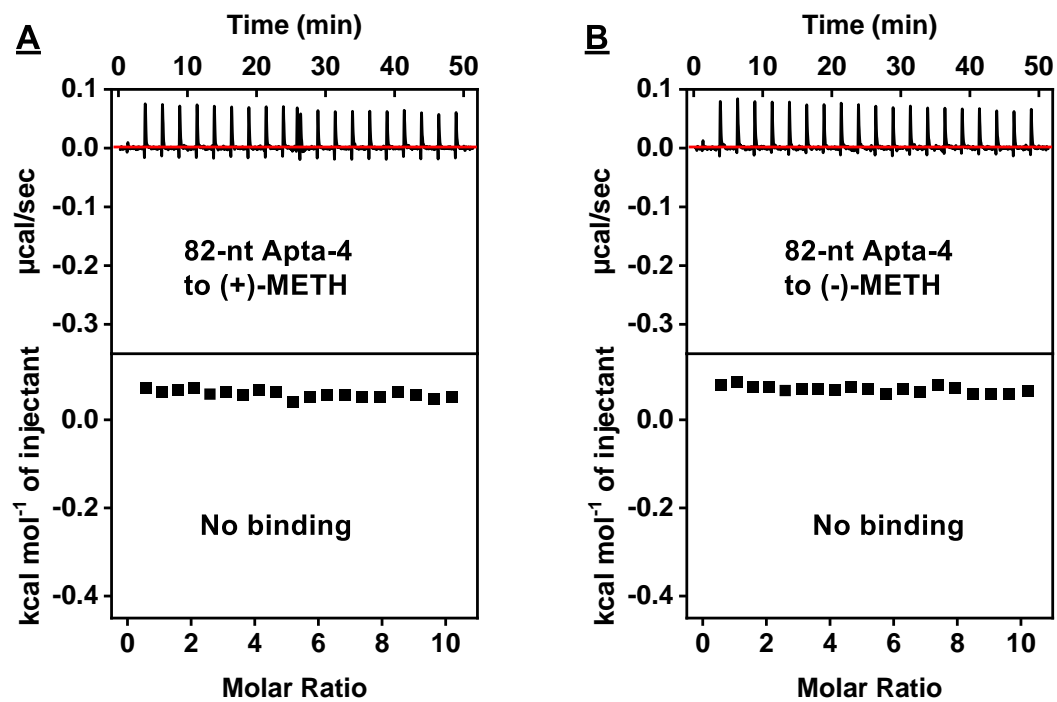

**Figure S8.** Binding affinity of Apta-4 for methamphetamine based on ITC in their reported selection buffer. Top panels display the heat generated from each titration of (A) 5 mM (+)-methamphetamine or (B) 5 mM (-)-methamphetamine into 100  $\mu\text{M}$  Apta-4. Bottom panels show the integrated heat of each titration after correcting for the heat of dilution of the titrant.

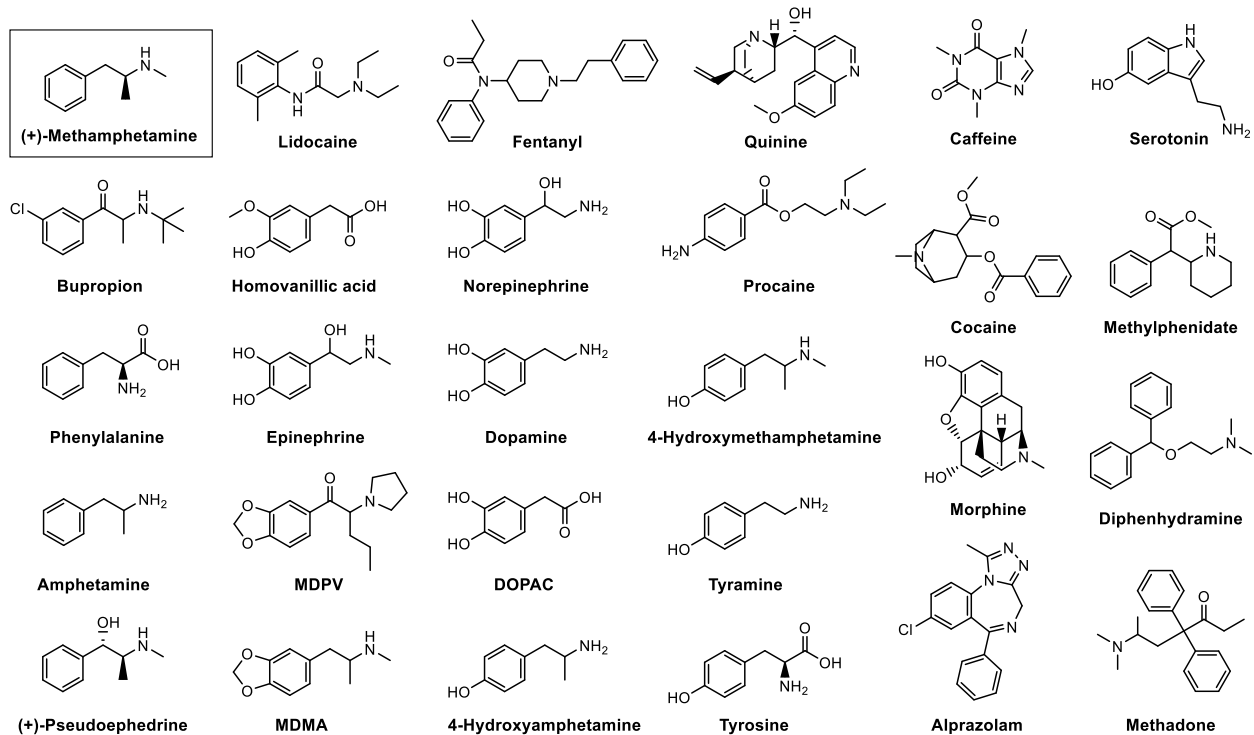

**Figure S9.** Chemical structures of the compounds used in this work.

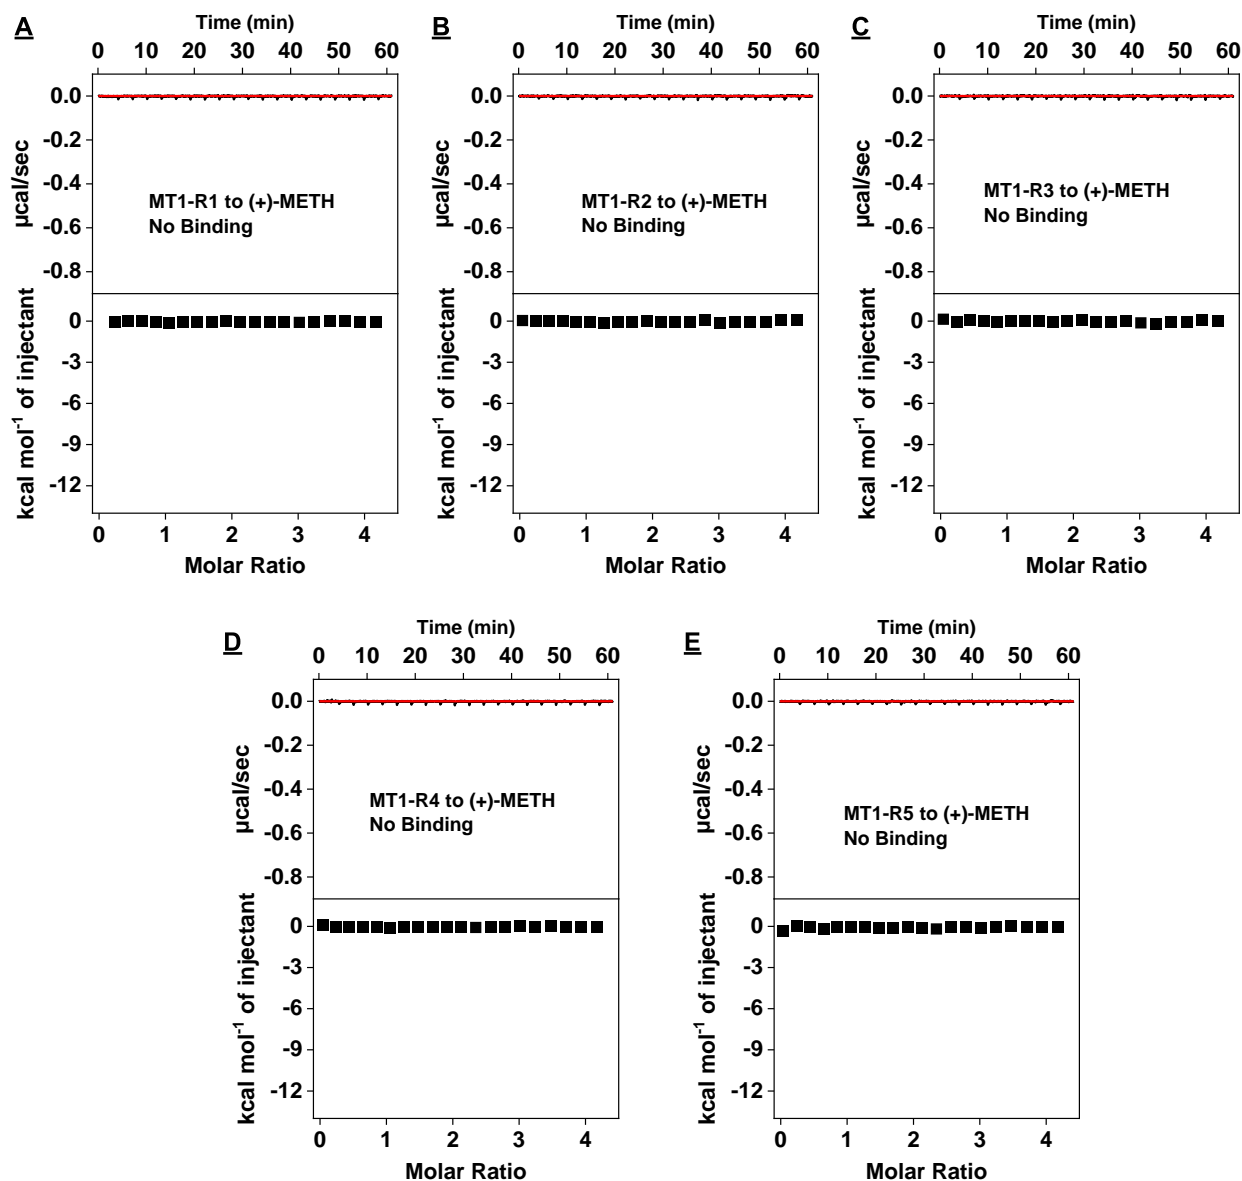

**Figure S10.** Binding affinity of aptamers discovered in the first trial of library-immobilized SELEX for (+)-methamphetamine based on ITC. Top panels display the heat generated from each titration of (+)-methamphetamine into (A) MT1-R1, (B) MT1-R2, (C) MT1-R3, (D) MT1-R4, and (E) MT1-R5. Bottom panels show the integrated heat of each titration after correcting for the heat of dilution of the titrant.

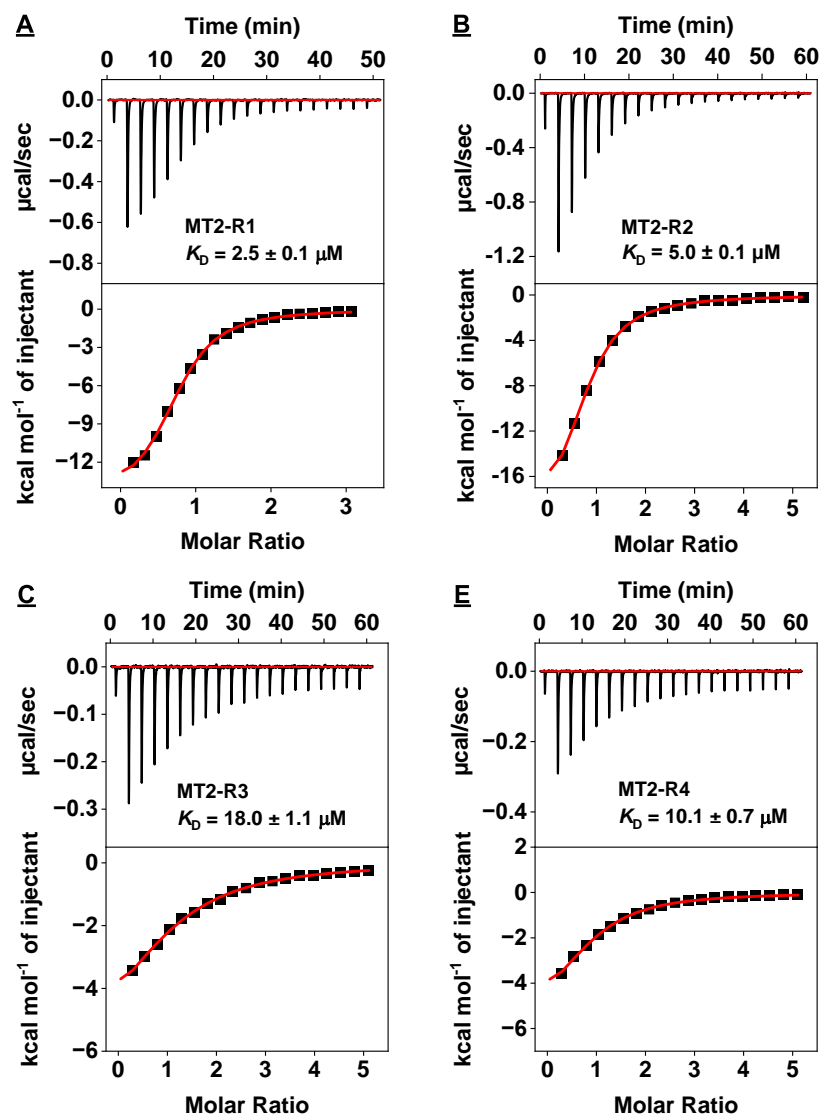

**Figure S11.** Binding affinity of aptamers discovered in the second trial of library-immobilized SELEX to (+)-methamphetamine based on ITC. Top panels display the heat generated from each titration of (+)-methamphetamine into (A) MT2-R1, (B) MT2-R2, (C) MT2-R3, and (D) MT2-R4. Bottom panels show the integrated heat of each titration after correcting for the heat of dilution of the titrant.

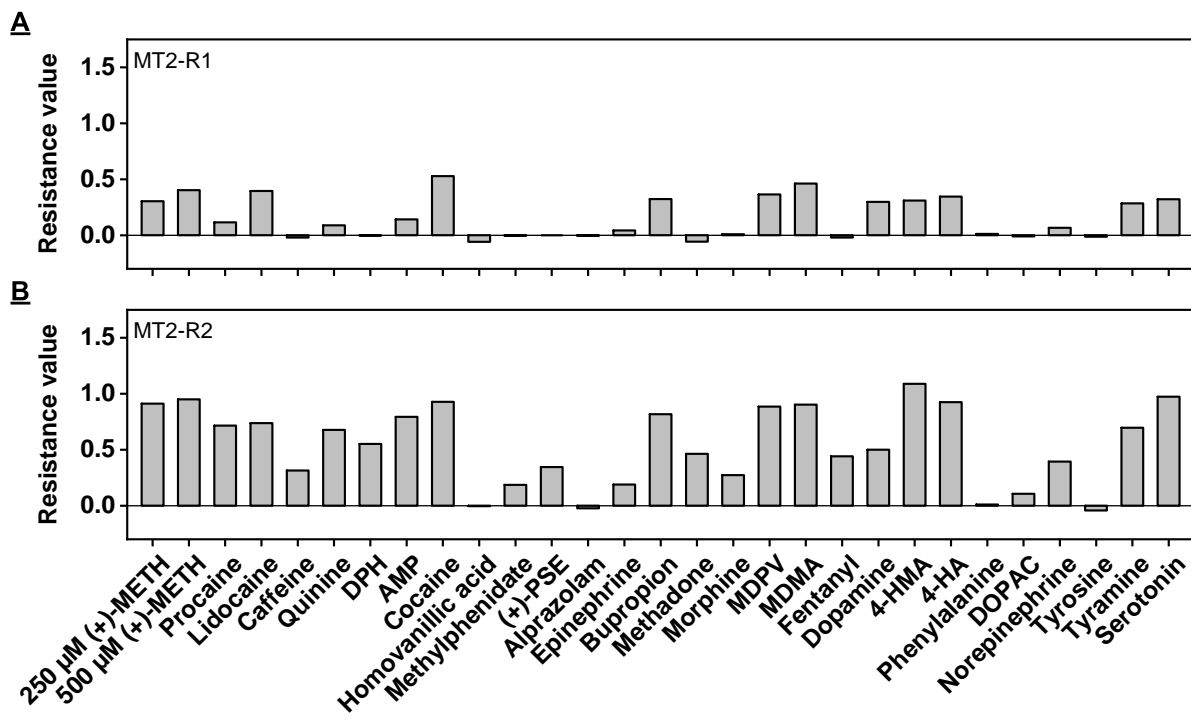

**Figure S12.** Screening the specificity of two aptamer candidates (MT2-R1 and MT2-R2) from the second SELEX trial using our exonuclease digestion assay. Plots show resistance value obtained from time-course digestion of (A) MT2-R1 and (B) MT2-R2 in the presence of 250  $\mu$ M selection target and various interferents, except for alprazolam (50  $\mu$ M).

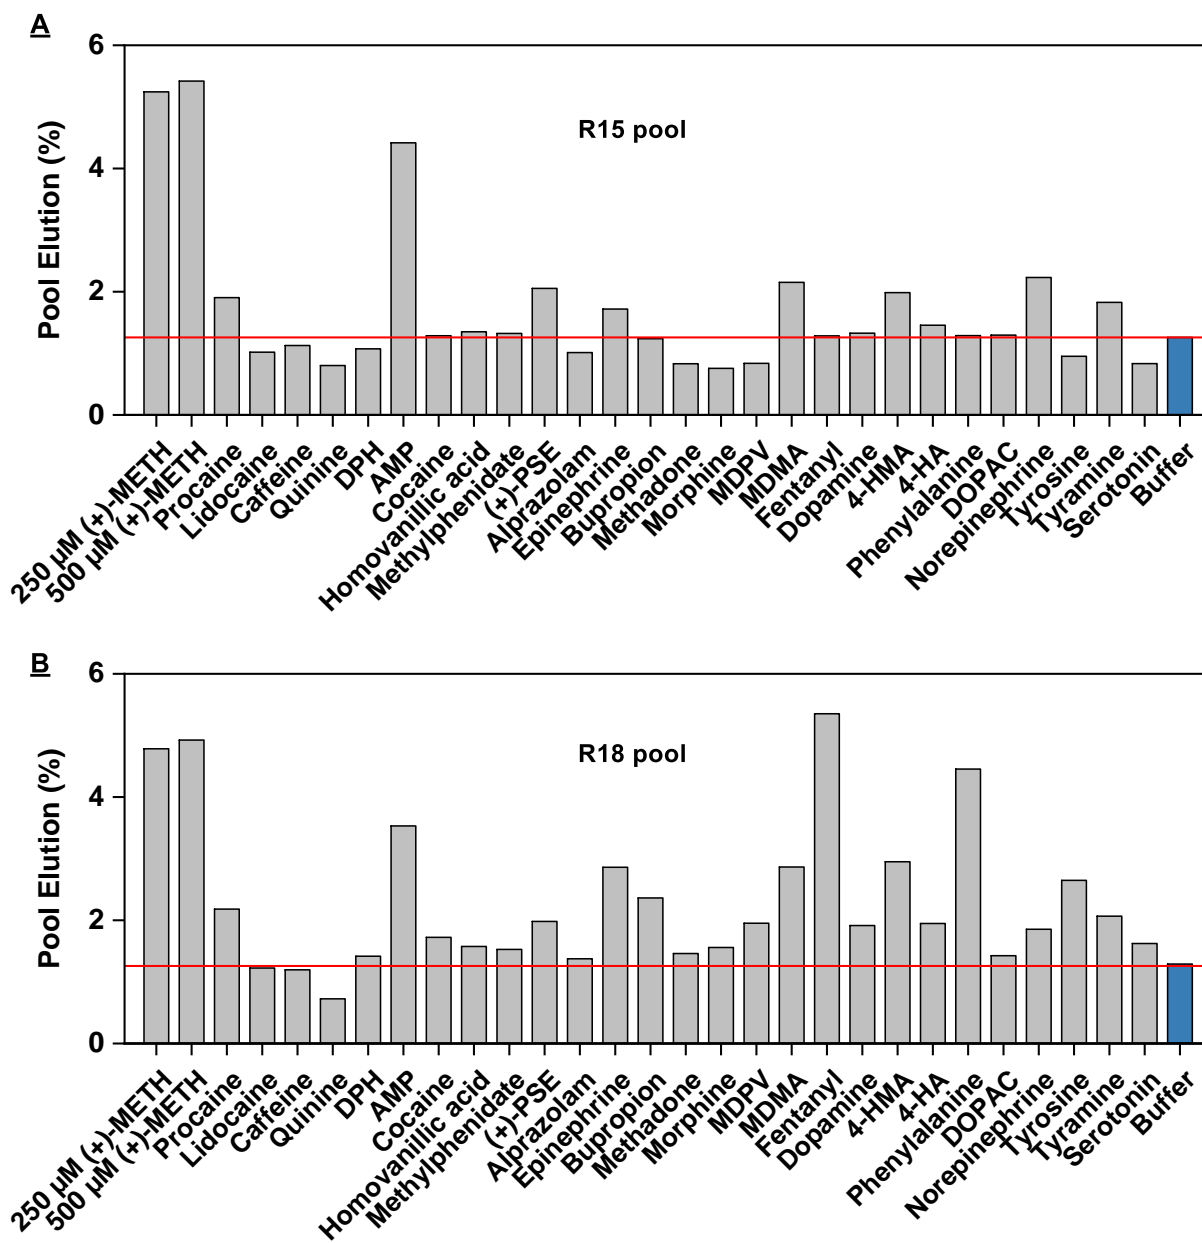

**Figure S13.** Specificity of the enriched pools from the third trial of library-immobilized SELEX for (+)-methamphetamine as determined using the gel-elution assay. Pool elution by methamphetamine, each counter-target, and buffer alone (blue bar and red line) is plotted for (A) Round 15 and (B) Round 18.

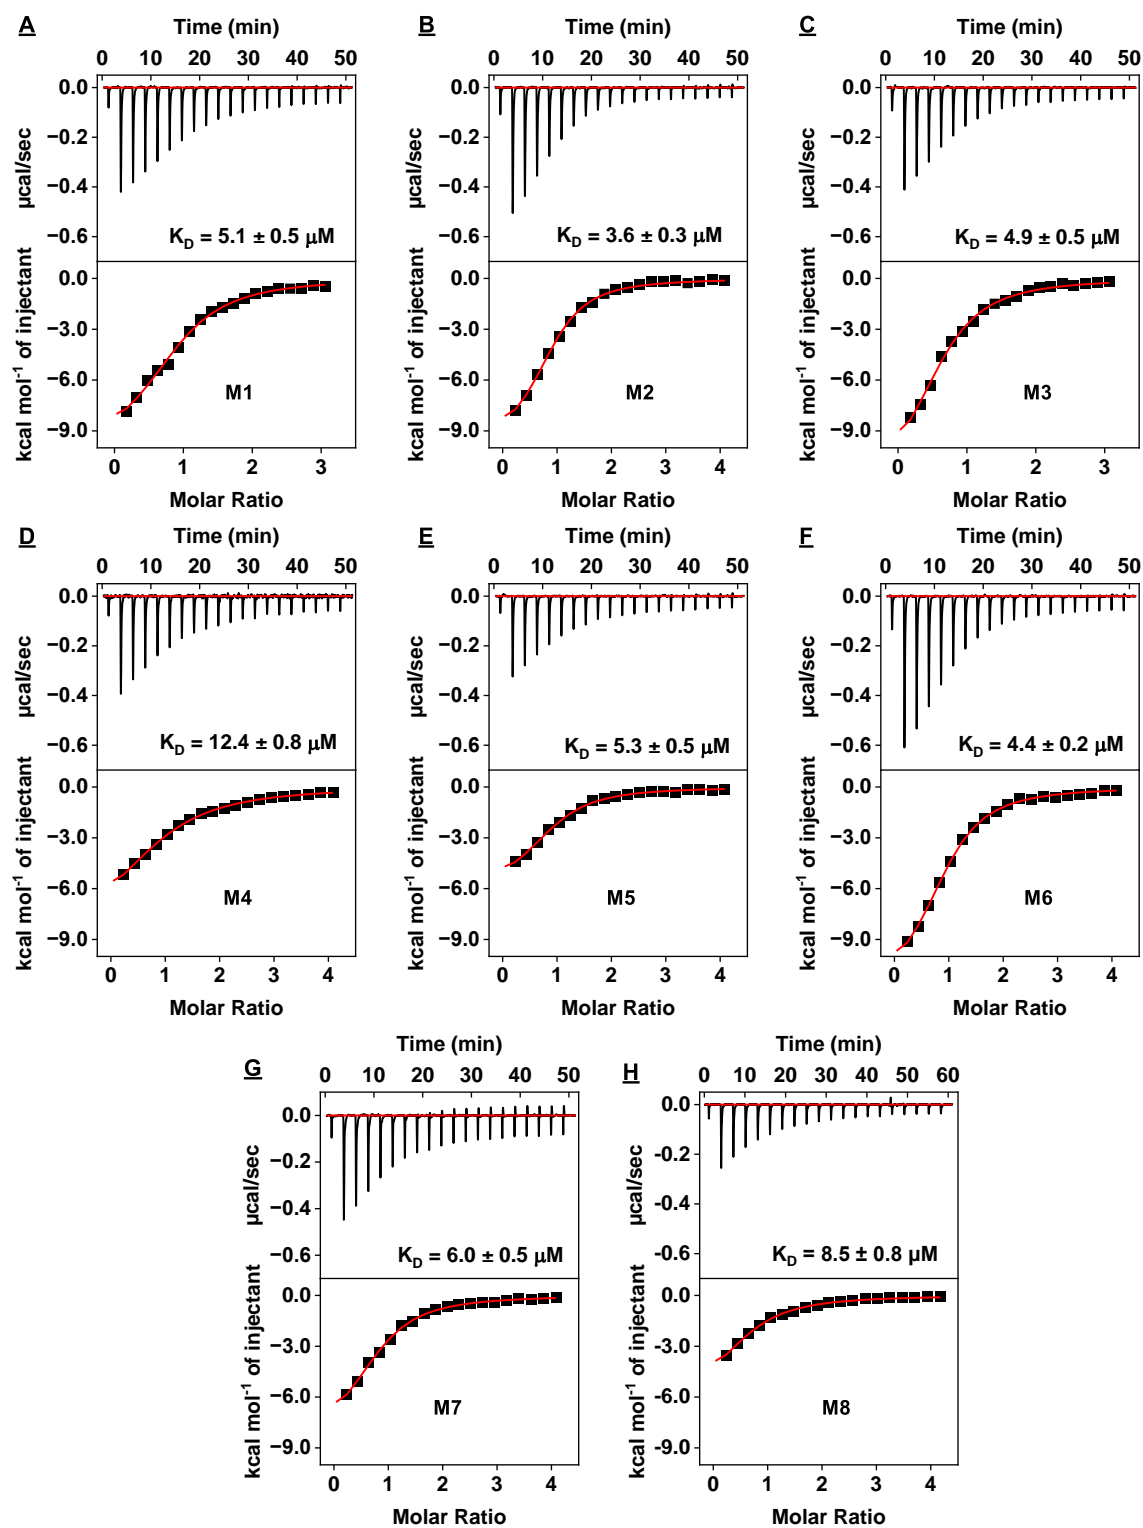

**Figure S14.** Binding affinity of aptamers discovered in the third trial of library-immobilized SELEX to (+)-methamphetamine based on ITC. Top panels display the heat generated from each titration of (+)-methamphetamine into (A) M1, (B) M2, (C) M3, (D) M4, (E) M5, (F) M6, (G) M7, and (H) M8. Bottom panels show the integrated heat of each titration after correcting for the heat of dilution of the titrant.

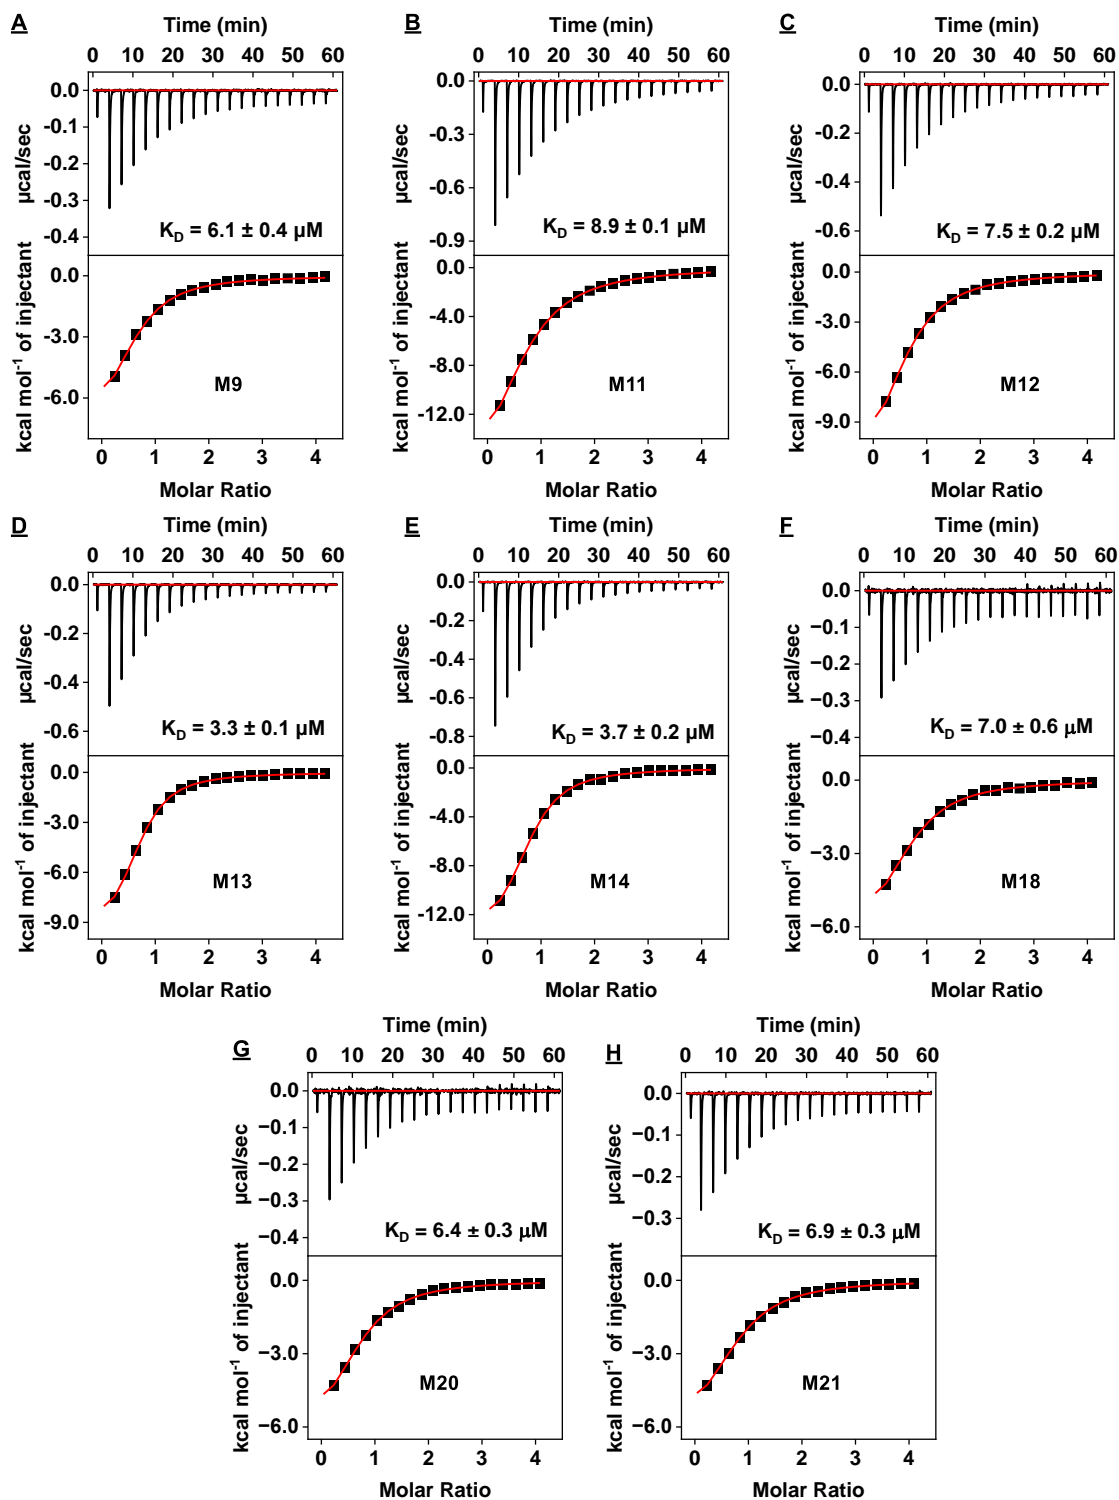

**Figure S15.** Binding affinity of aptamers discovered in the third trial of library-immobilized SELEX for (+)-methamphetamine based on ITC. Top panels display the heat generated from each titration of (+)-methamphetamine into (A) M9, (B) M11, (C) M12, (D) M13, (E) M14, (F) M18, (G) M20, and (H) M21. Bottom panels show the integrated heat of each titration after correcting for the heat of dilution of the titrant.



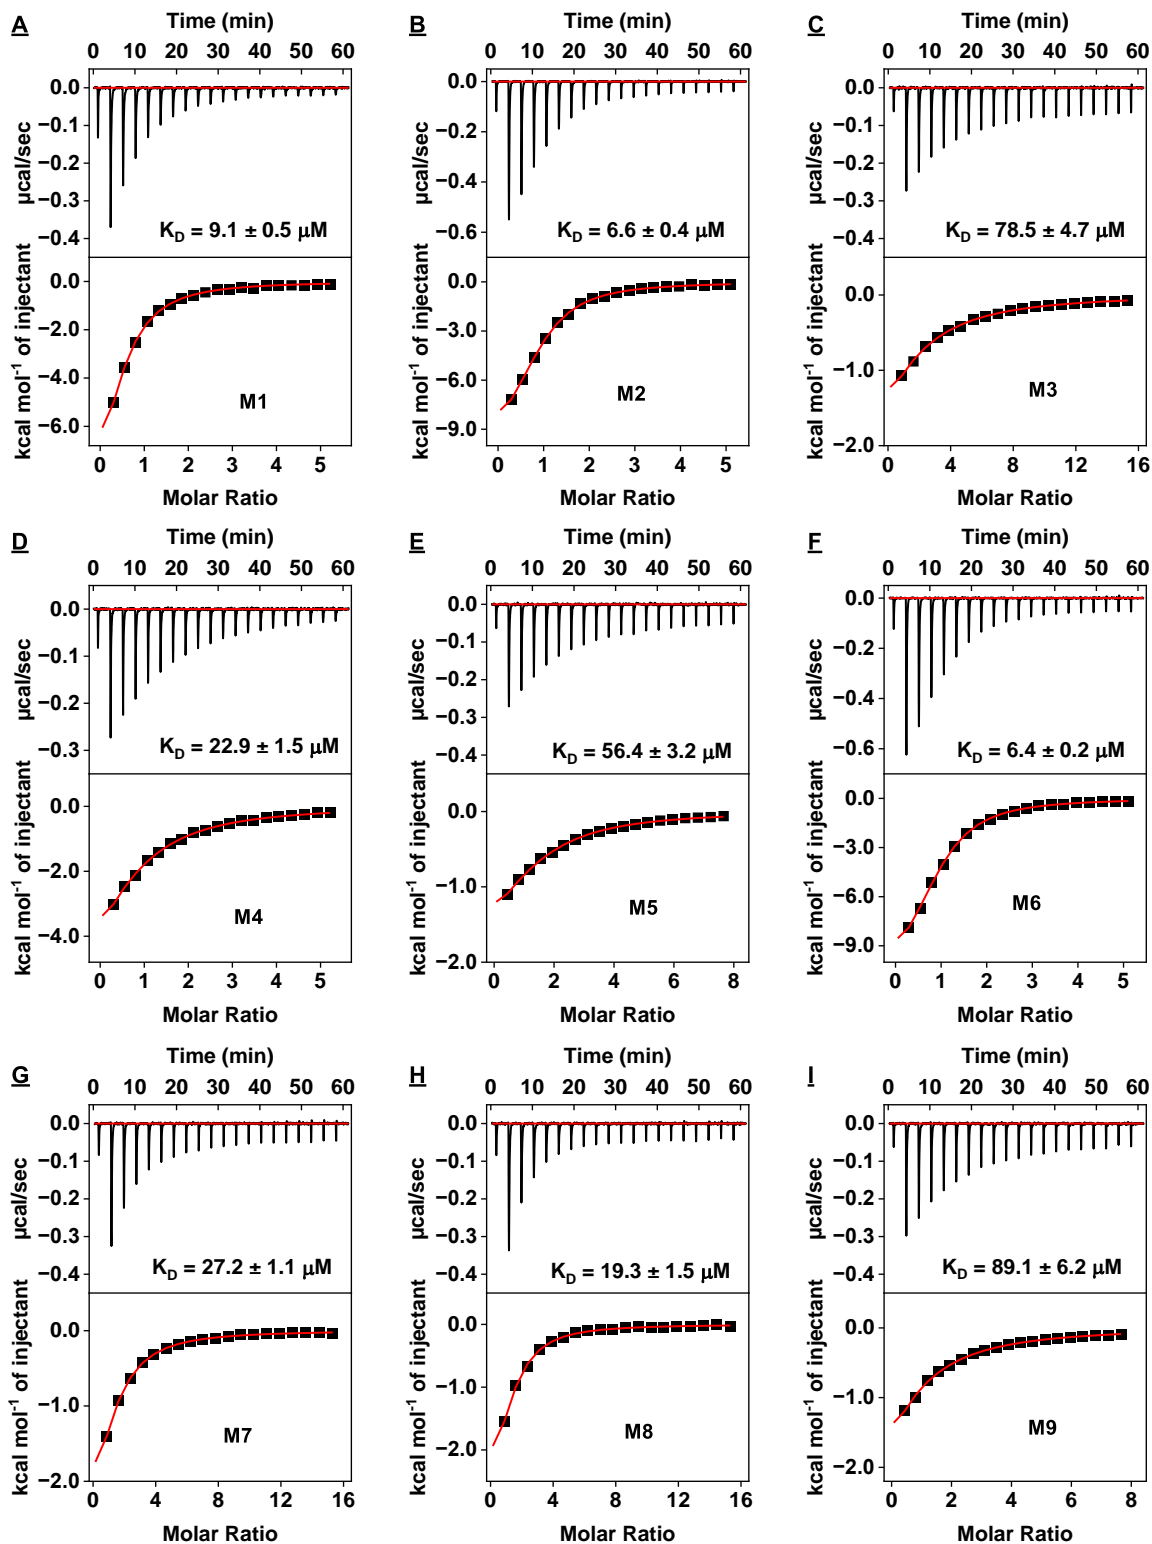

**Figure S16.** Binding affinity of aptamers discovered in the third trial of library-immobilized SELEX for amphetamine based on ITC. Top panels display the heat generated from each titration of amphetamine into (A) M1, (B) M2, (C) M3, (D) M4, (E) M5, (F) M6, (G) M7, (H) M8, and (I) M9. Bottom panels show the integrated heat of each titration after correcting for the heat of dilution of the titrant.

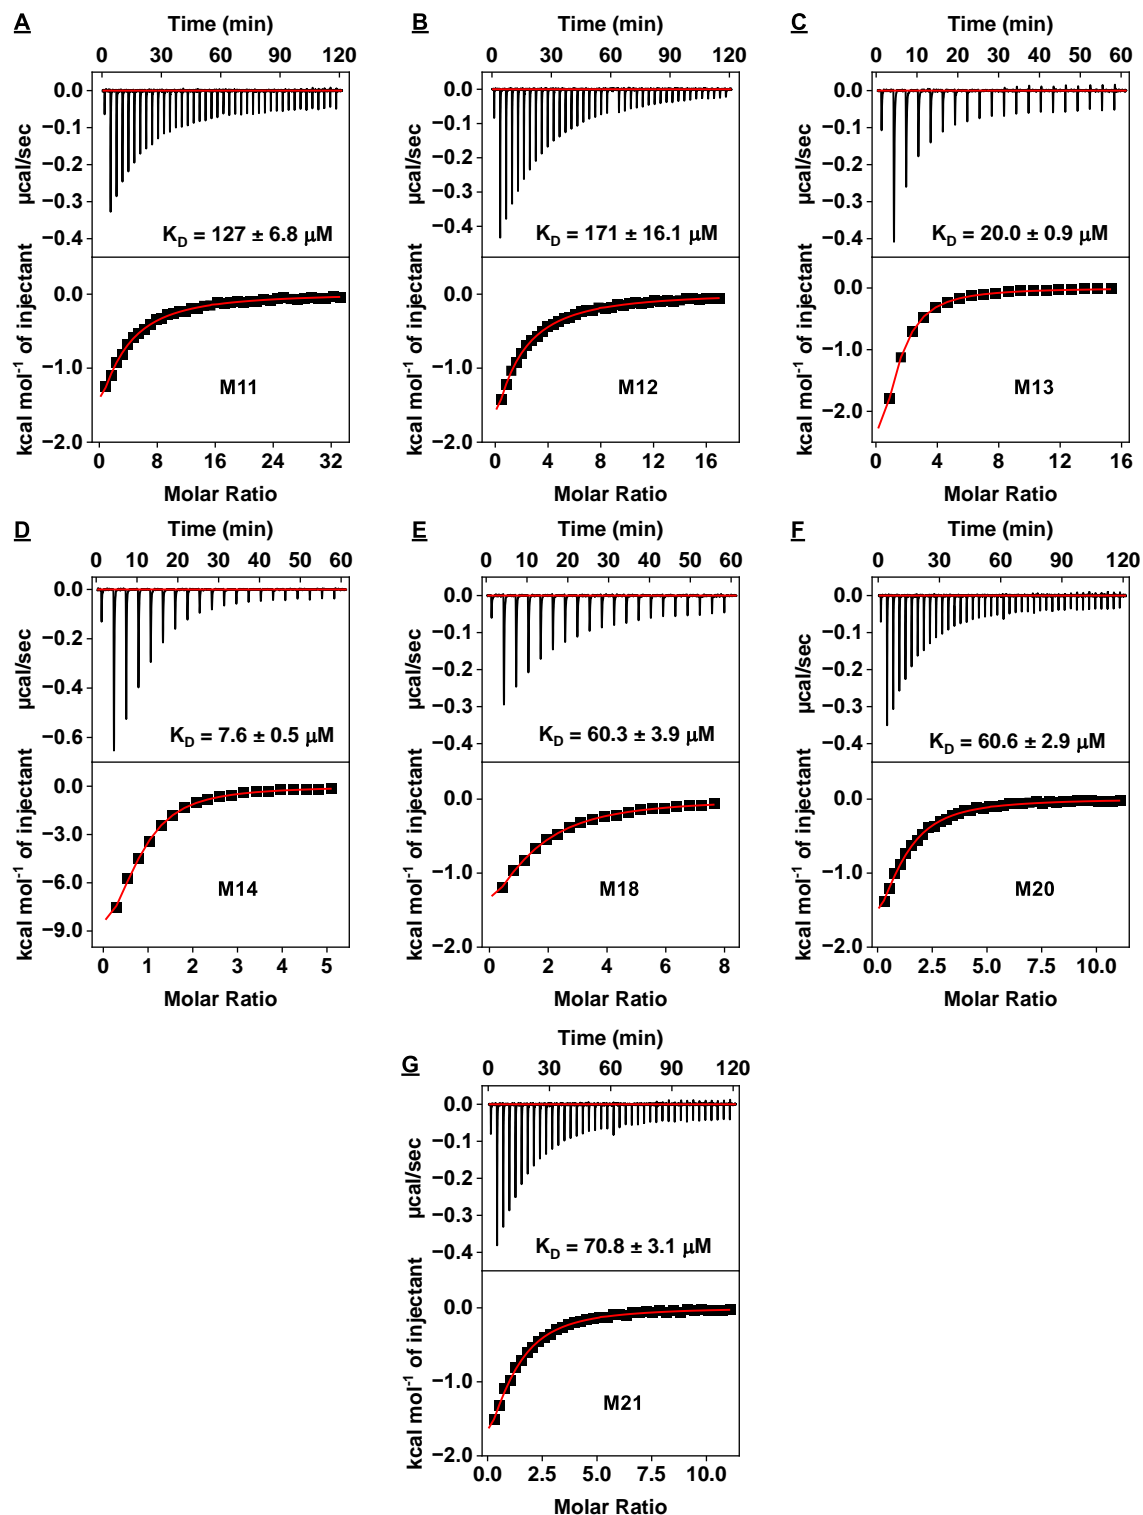

**Figure S17.** Binding affinity of aptamers discovered in the third trial of library-immobilized SELEX for amphetamine based on ITC. Top panels display the heat generated from each titration of amphetamine into (A) M11, (B) M12, (C) M13, (D) M14, (E) M18, (F) M20, and (G) M21. Bottom panels show the integrated heat of each titration after correcting for the heat of dilution of the titrant.

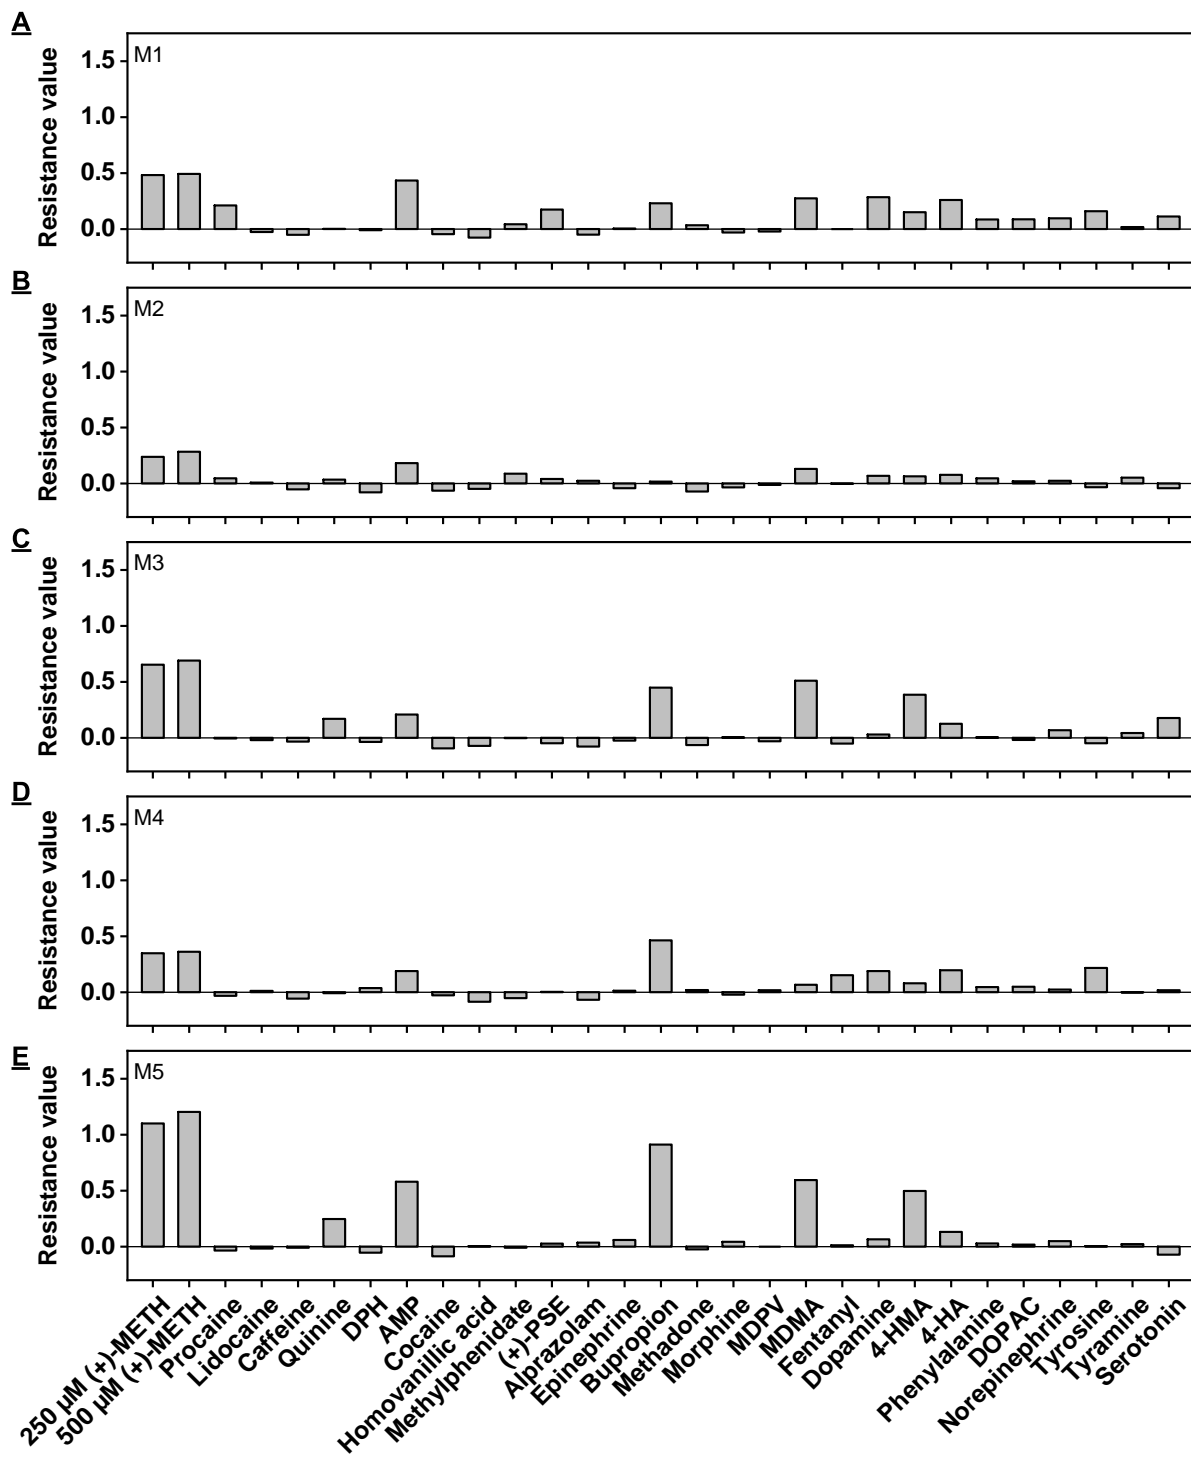

**Figure S18.** Screening the specificity of five aptamer candidates from the third SELEX trial using our exonuclease digestion assay. Plots show resistance value obtained from time-course digestion of (A) M1, (B) M2, (C) M3, (D) M4, and (E) M5 in the presence of 250  $\mu\text{M}$  selection target and various interferents, except for alprazolam (50  $\mu\text{M}$ ).

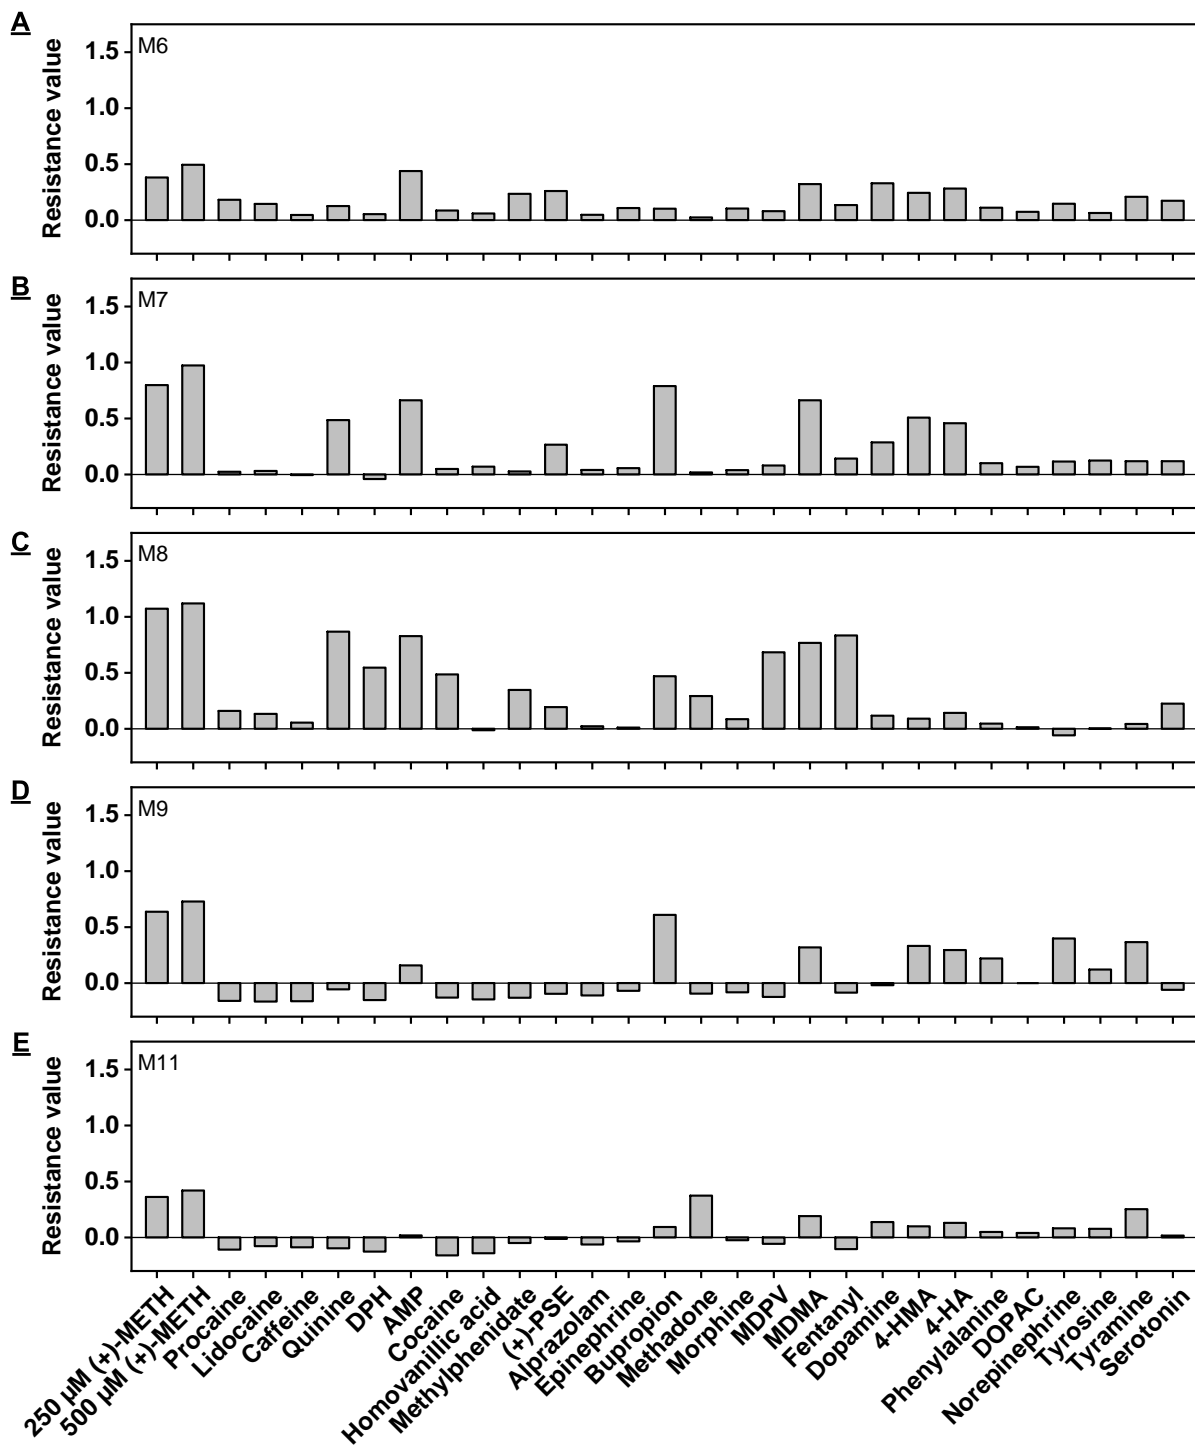

**Figure S19.** Screening the specificity of five aptamer candidates from the third SELEX trial using our exonuclease digestion assay. Plots show resistance value obtained from time-course digestion of (A) M6, (B) M7, (C) M8, (D) M9, and (E) M11 in the presence of 250  $\mu$ M selection target and various interferents, except for alprazolam (50  $\mu$ M).

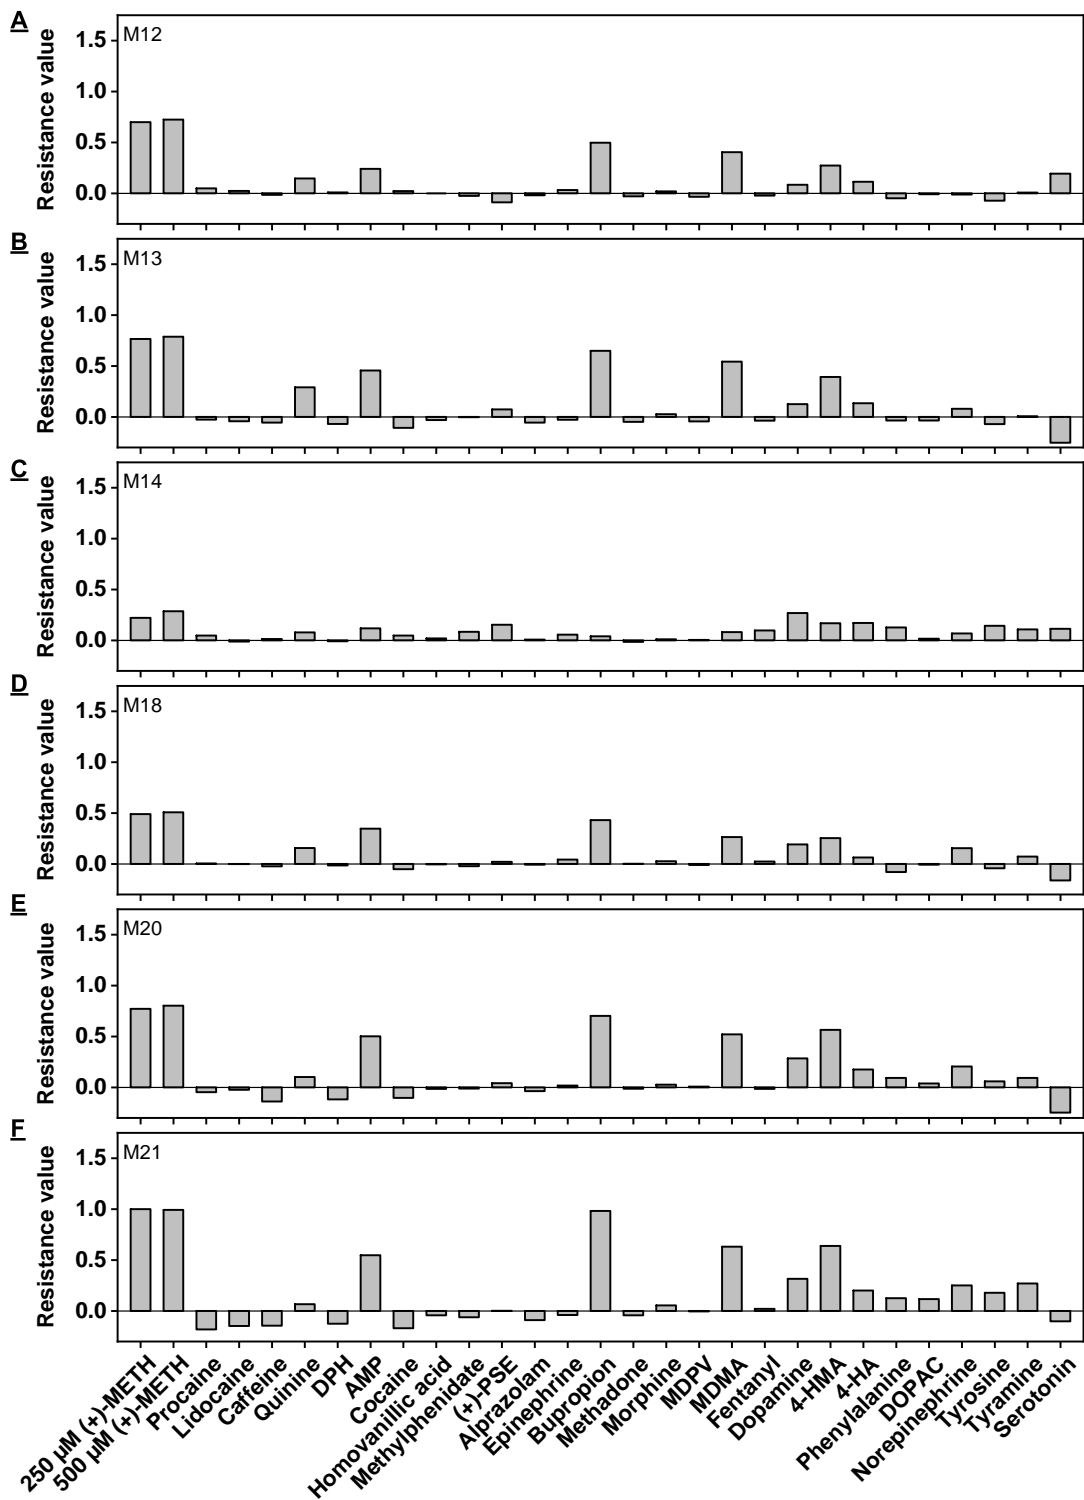

**Figure S20.** Screening the specificity of six aptamer candidates from the third SELEX trial using our exonuclease digestion assay. Plots show resistance value obtained from time-course digestion of (A) M12, (B) M13, (C) M14, (D) M18, (E) M20 and (F) M21 in the presence of 250  $\mu\text{M}$  selection target and various interferents, except for alprazolam (50  $\mu\text{M}$ ).

A. Selection buffer with 0.005% Triton X-100

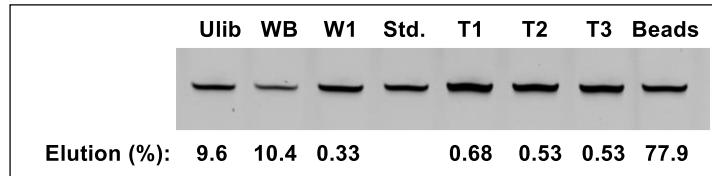

B. Selection buffer without 0.005% Triton X-100

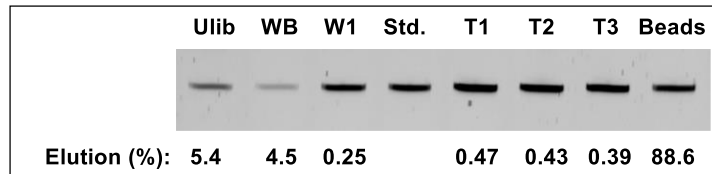

**Figure S21.** The effect of including Triton X-100 in the selection buffer on washing efficiency during library-immobilized SELEX. The naive library was hybridized with biotinylated cDNA, immobilized onto streptavidin-coated agarose beads, and then washed with selection buffer (A) with or (B) without 0.005% Triton-X100, and then finally challenged with methamphetamine. Samples eluted from the column were collected and analyzed by PAGE. ‘Ulib’ = non-immobilized library after incubating library-cDNA complexes with streptavidin-coated agarose. ‘WB’ = library washed away by ten washes with 250  $\mu$ L selection buffer. ‘W1’ = library eluted by one wash of 250  $\mu$ L selection buffer prior to challenging the library with target. ‘Std.’ = a 10 nM standard made using the naïve library. ‘T1’, ‘T2’, and ‘T3’ = elution of library after challenging with three sequential 250  $\mu$ L aliquots of methamphetamine in selection buffer (without Triton X-100). ‘Beads’ = library remaining on the beads at the end of the selection round.

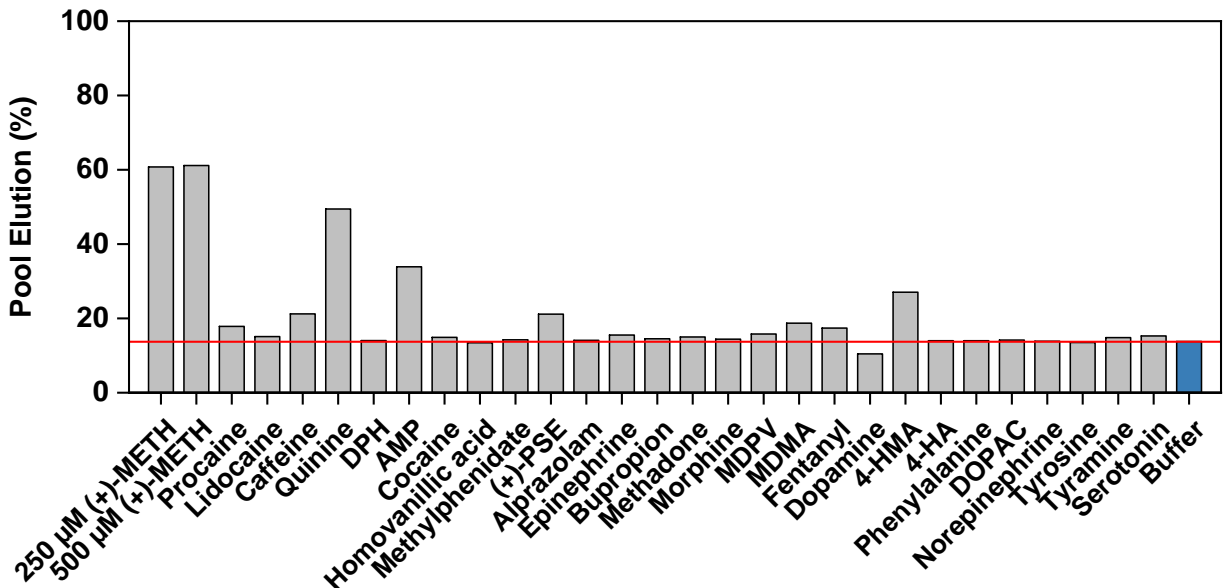

**Figure S22.** Specificity of the Round 13 pool from the fourth trial of library-immobilized SELEX for (+)-methamphetamine as determined using the gel-elution assay. Red line indicates the threshold of elution by the buffer-only negative control.

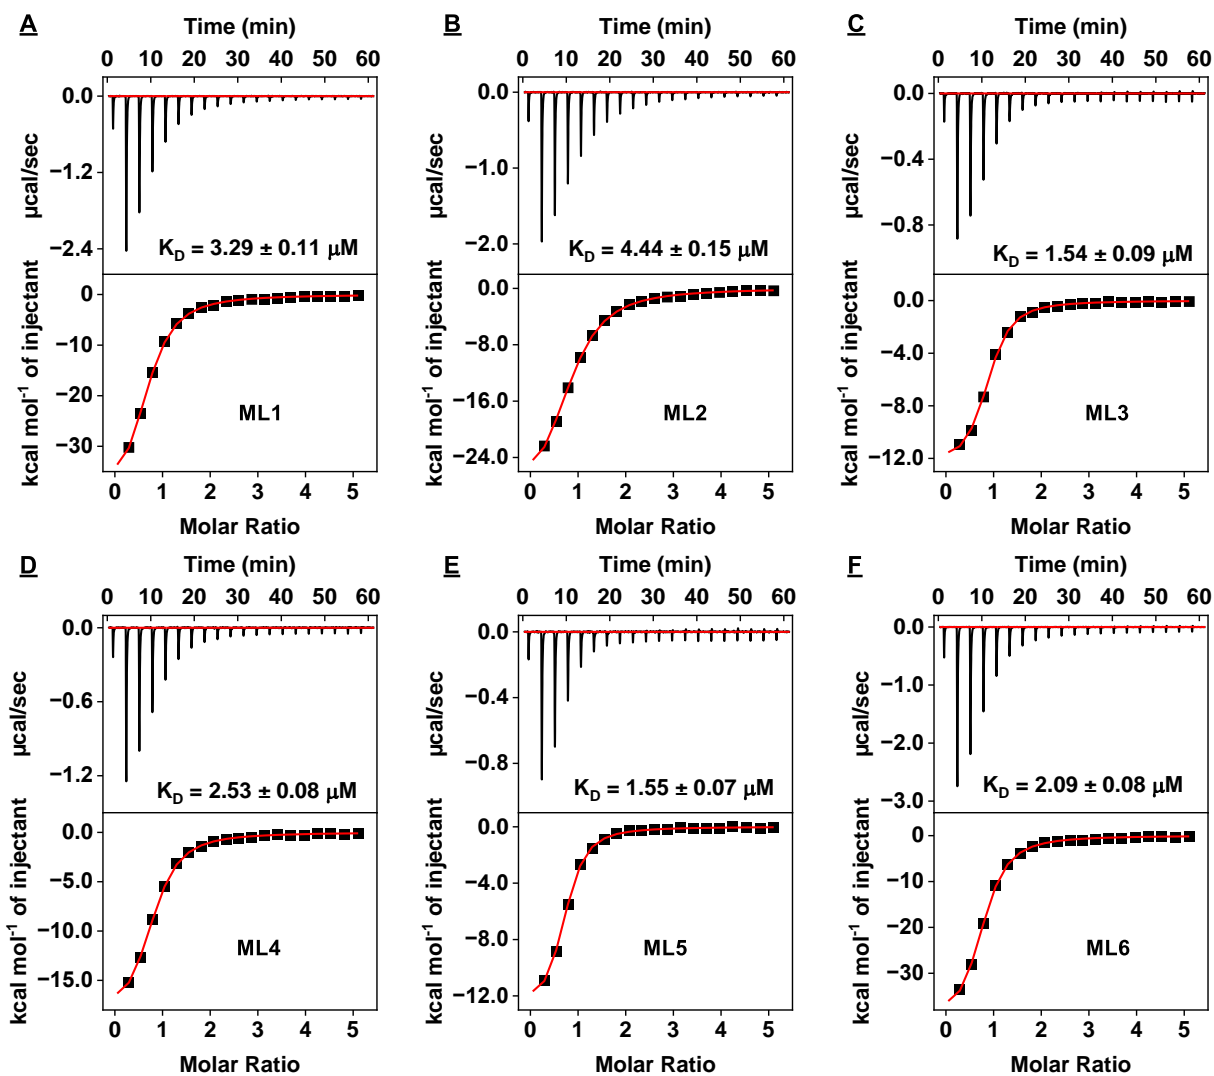

**Figure S23.** Binding affinity of aptamers isolated in the fourth trial of library-immobilized SELEX for (+)-methamphetamine based on ITC. Top panels display the heat generated from each titration of (+)-methamphetamine into (A) ML1, (B) ML2, (C) ML3, (D) ML4, (E) ML5, and (F) ML6. Bottom panels show the integrated heat of each titration after correcting for the heat of dilution of the titrant.

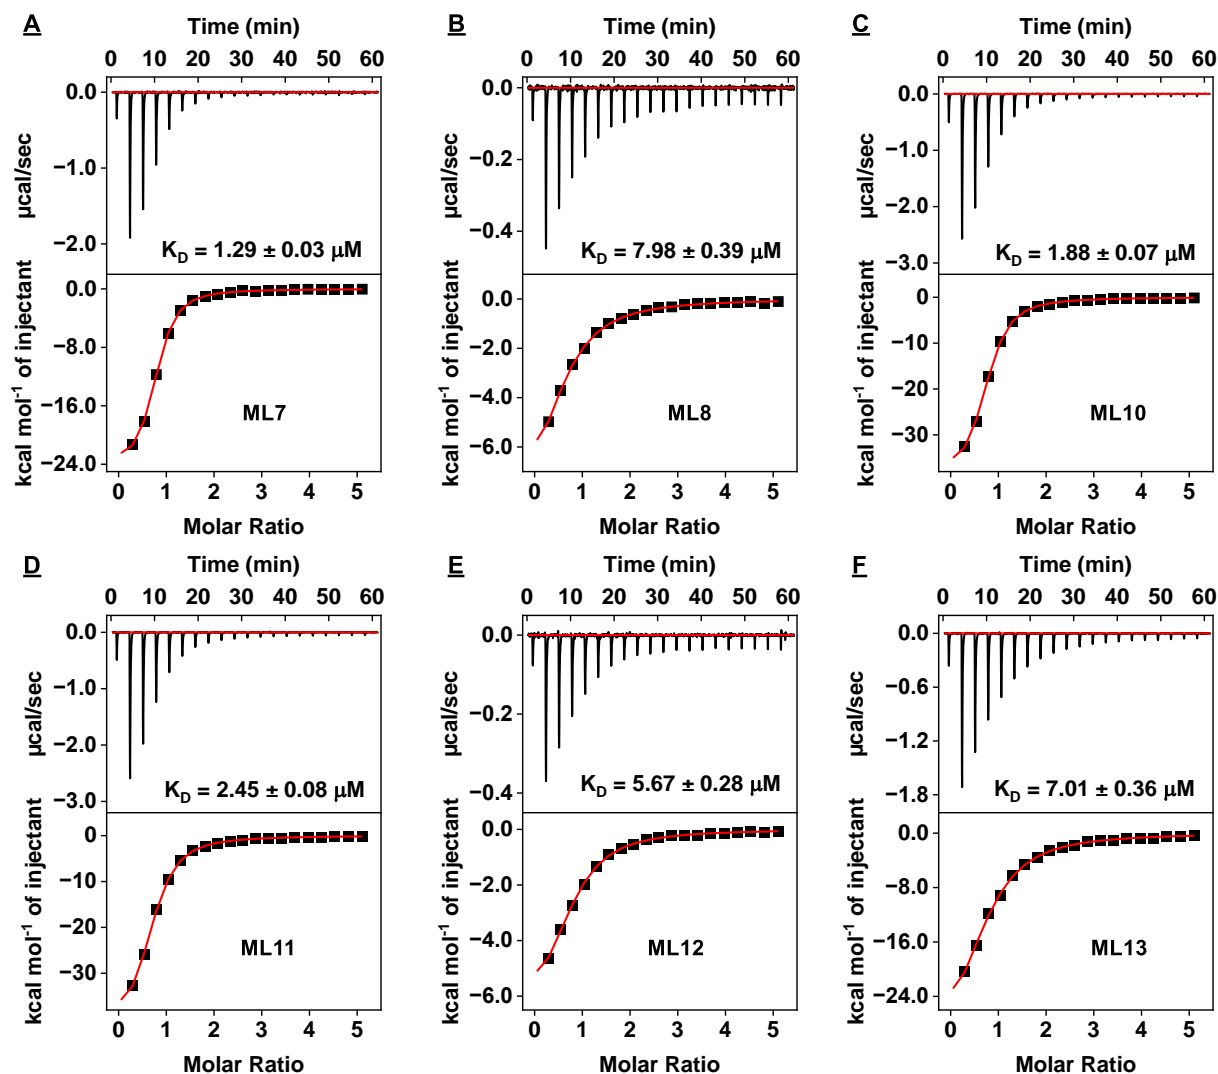

**Figure S24.** Binding affinity of aptamers isolated in the fourth trial of library-immobilized SELEX for (+)-methamphetamine based on ITC. Top panels display the heat generated from each titration of (+)-methamphetamine into (A) ML7, (B) ML8, (C) ML10, (D) ML11, (E) ML12, and (F) ML13. Bottom panels show the integrated heat of each titration after correcting for the heat of dilution of the titrant.



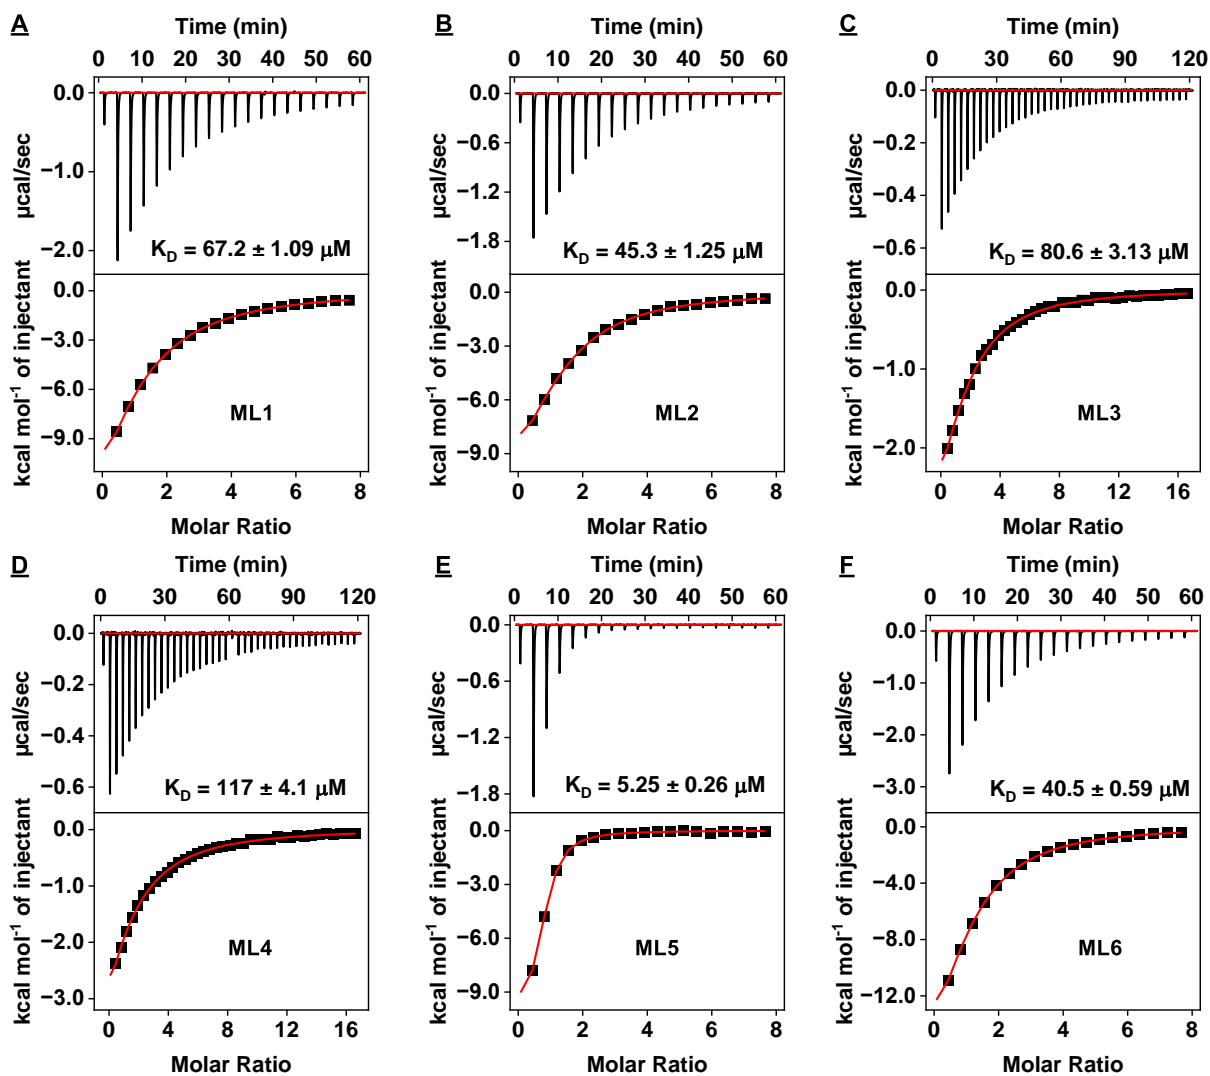

**Figure S25.** Binding affinity of aptamers discovered in the fourth trial of library-immobilized SELEX for amphetamine based on ITC. Top panels display the heat generated from each titration of amphetamine into (A) ML1, (B) ML2, (C) ML3, (D) ML4, (E) ML5, and (F) ML6. Bottom panels show the integrated heat of each titration after correcting for the heat of dilution of the titrant.

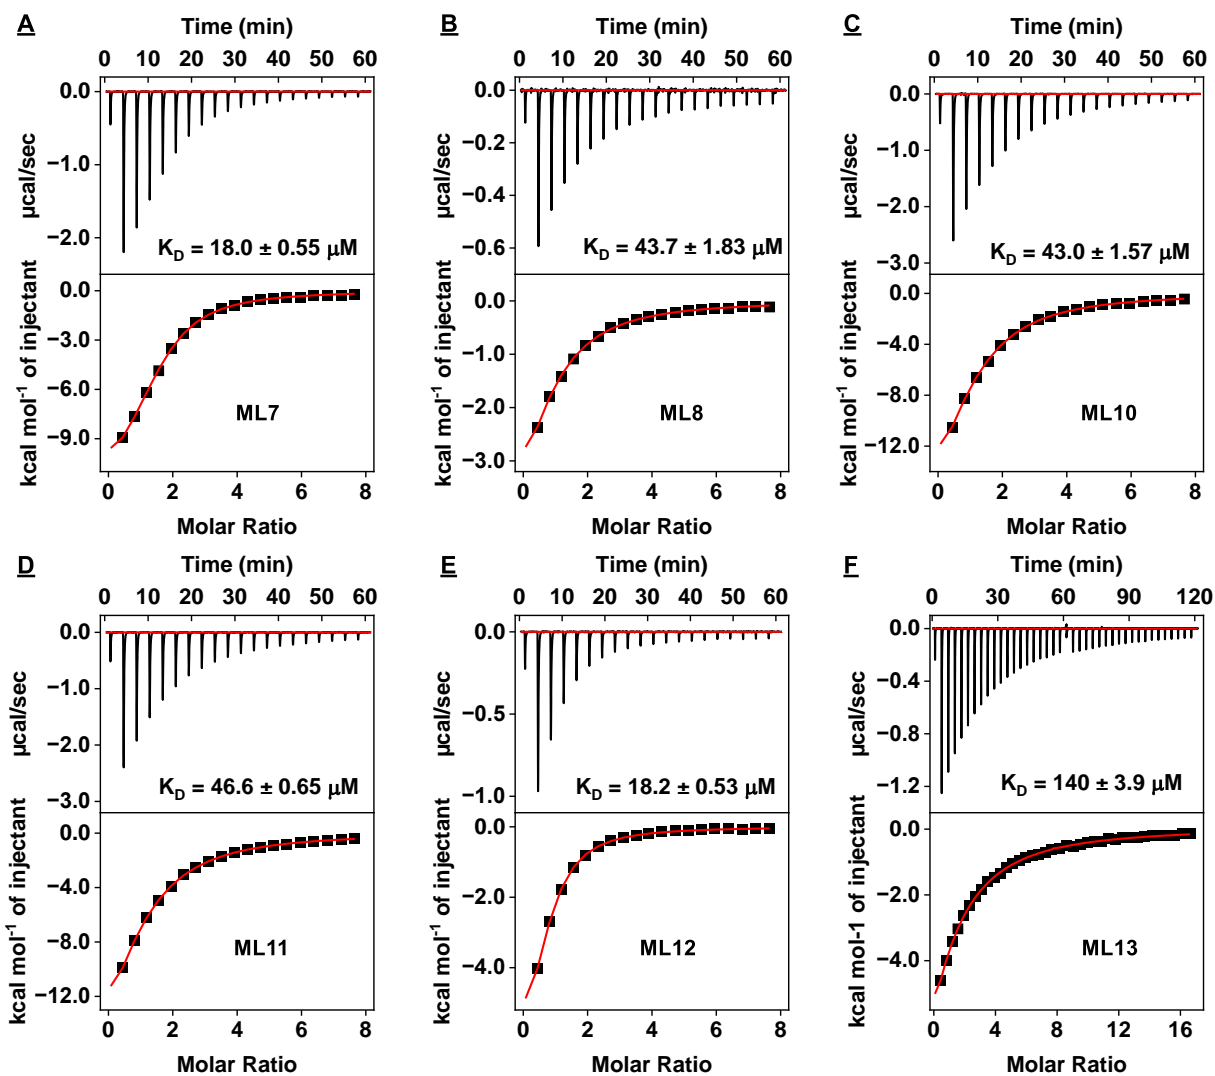

**Figure S26.** Binding affinity of aptamers discovered in the fourth trial of library-immobilized SELEX for amphetamine based on ITC. Top panels display the heat generated from each titration of amphetamine into (A) ML7, (B) ML8, (C) ML10, (D) ML11, (E) ML12, and (F) ML13. Bottom panels show the integrated heat of each titration after correcting for the heat of dilution of the titrant.

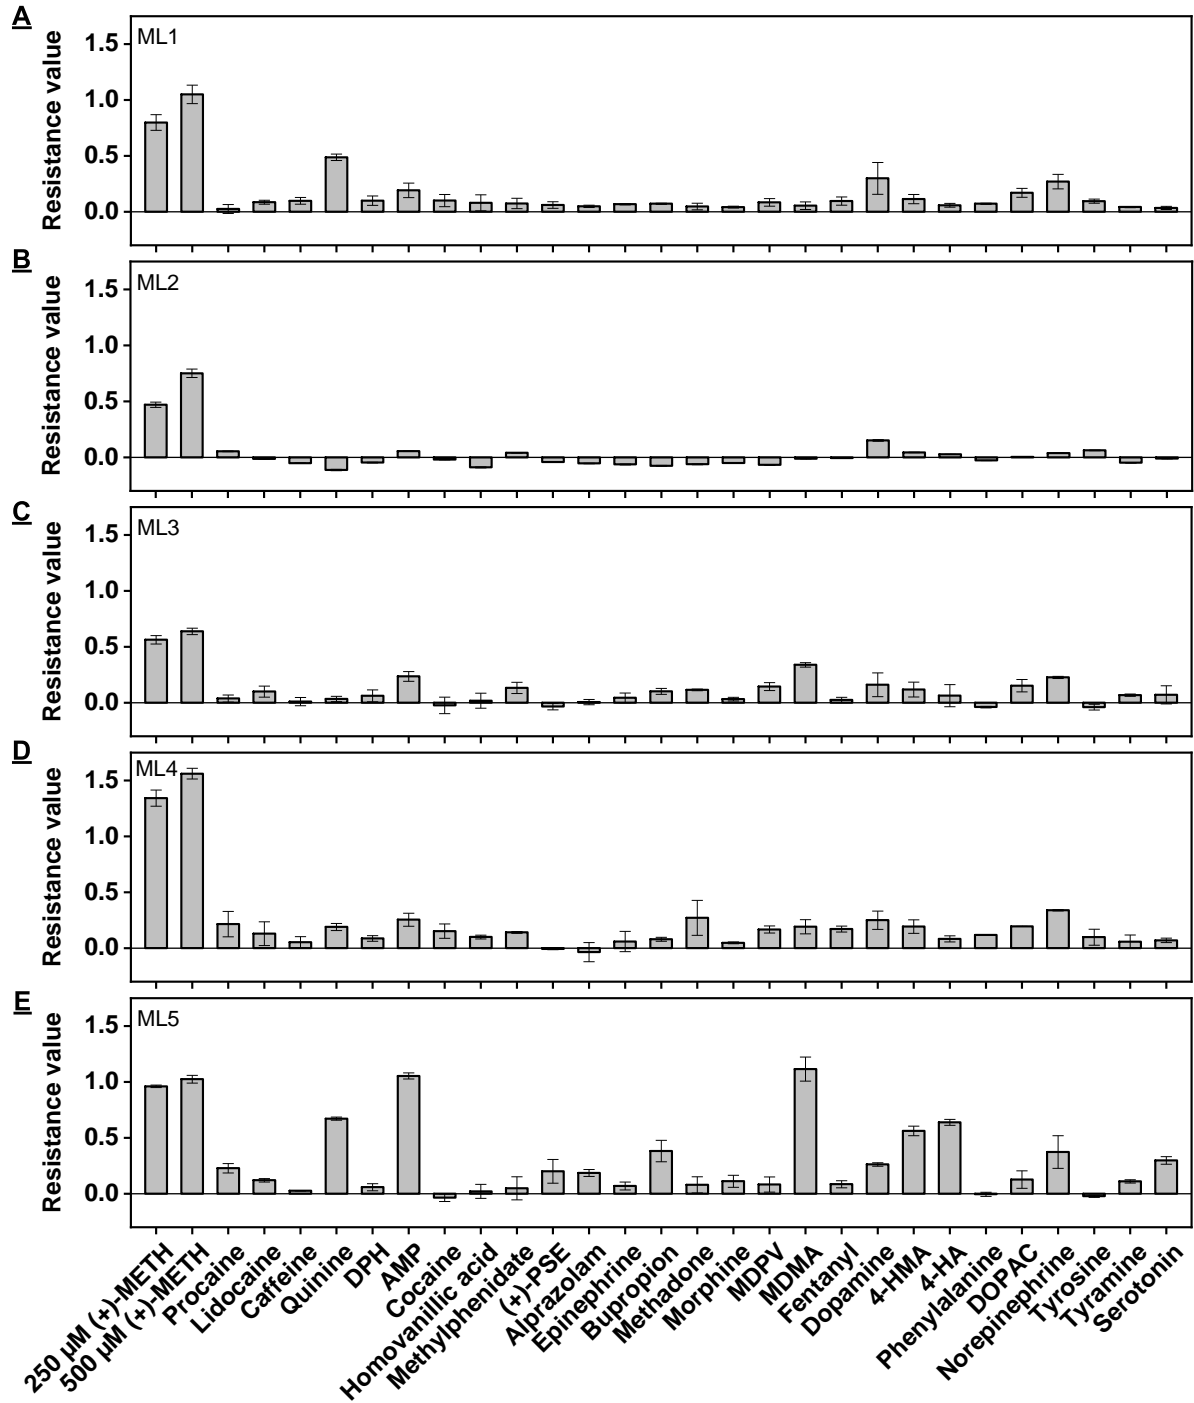

**Figure S27.** Screening the specificity of five aptamer candidates from the fourth SELEX trial using our exonuclease digestion assay. Plots show resistance value obtained from time-course digestion of (A) ML1, (B) ML2, (C) ML3, (D) ML4, and (E) ML5 in the presence of 250  $\mu$ M selection target and various interferents, except for alprazolam (50  $\mu$ M).

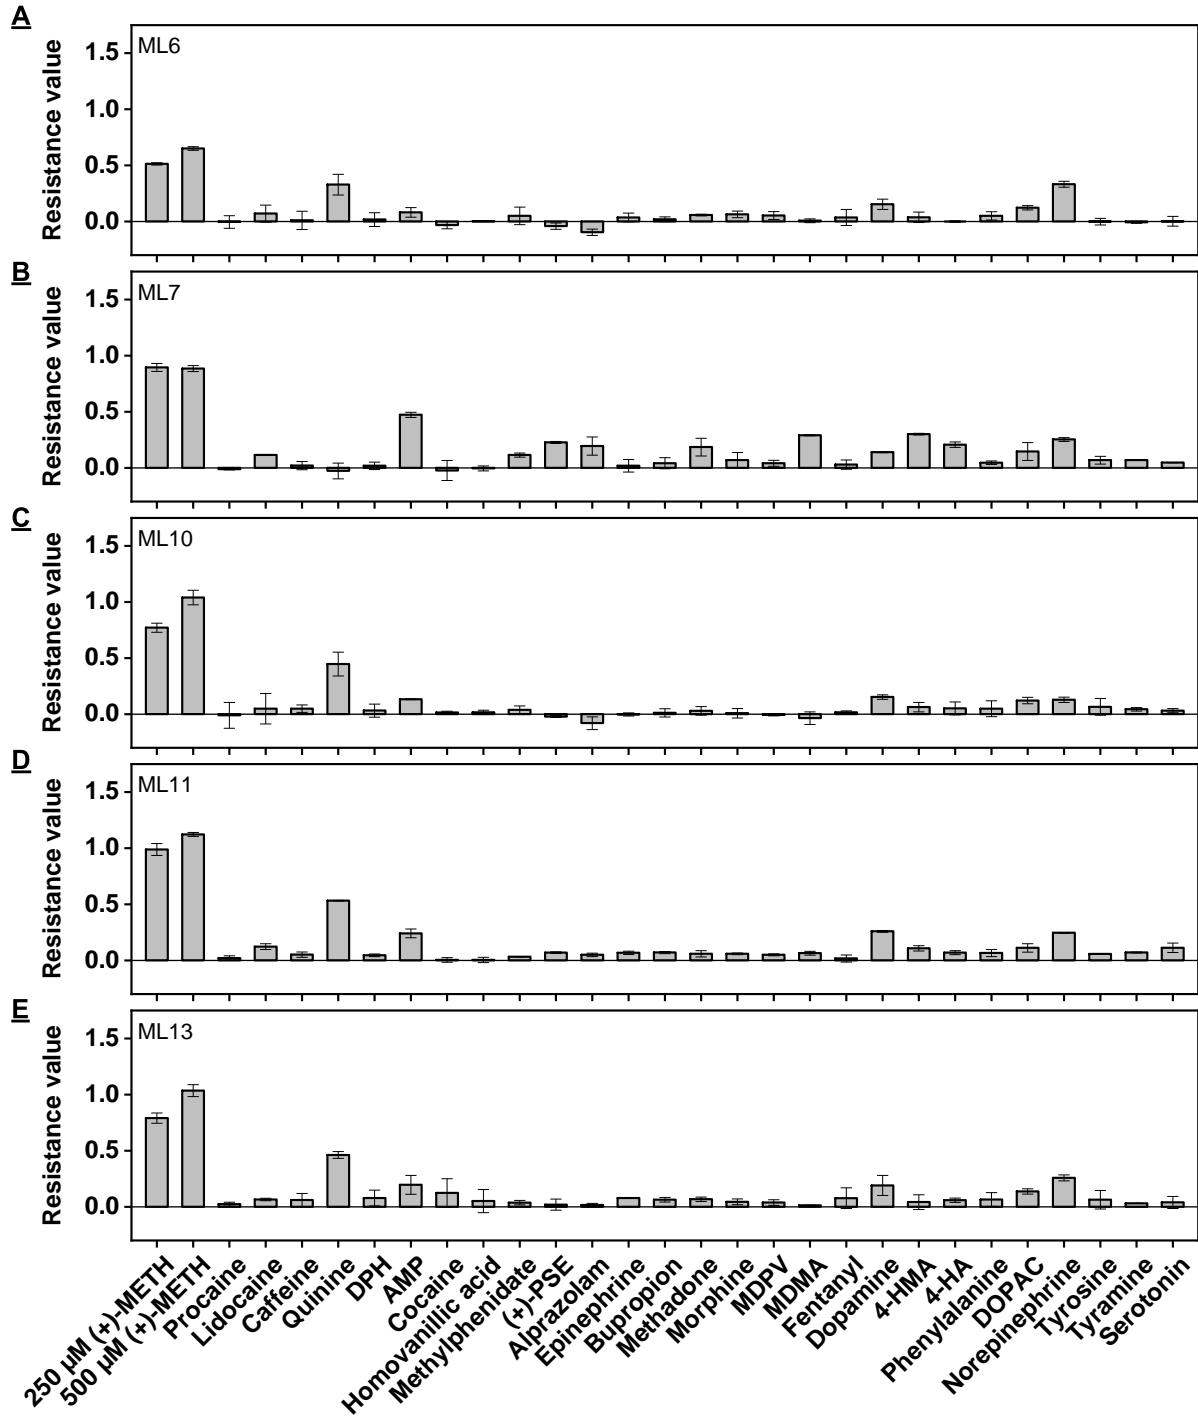

**Figure S28.** Screening the specificity of five aptamer candidates from the fourth SELEX trial using our exonuclease digestion assay. Plots show resistance value obtained from time-course digestion of (A) ML6, (B) ML7, (C) ML10, (D) ML11, and (E) ML13 in the presence of 250  $\mu$ M selection target and various interferents, except for alprazolam (50  $\mu$ M).

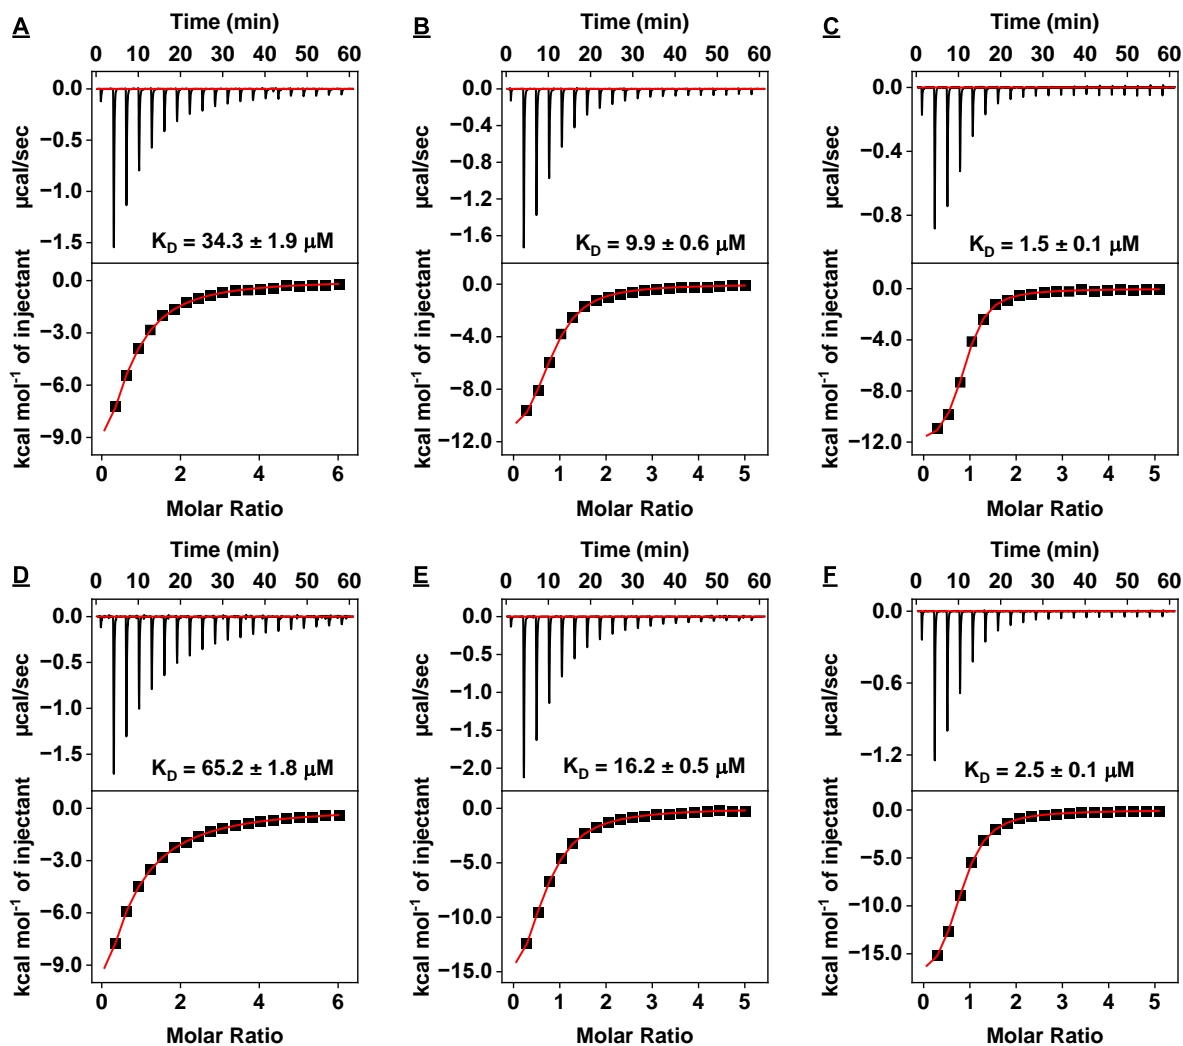

**Figure S29.** Binding affinity of aptamers for (+)-methamphetamine based on ITC. Top panels display the heat generated from each titration of (+)-methamphetamine into (A–C) ML3 and (D–E) ML4 in the presence of 1, 2 and 5 mM  $Mg^{2+}$ , respectively. Bottom panels show the integrated heat of each titration after correcting for the heat of titrant dilution.

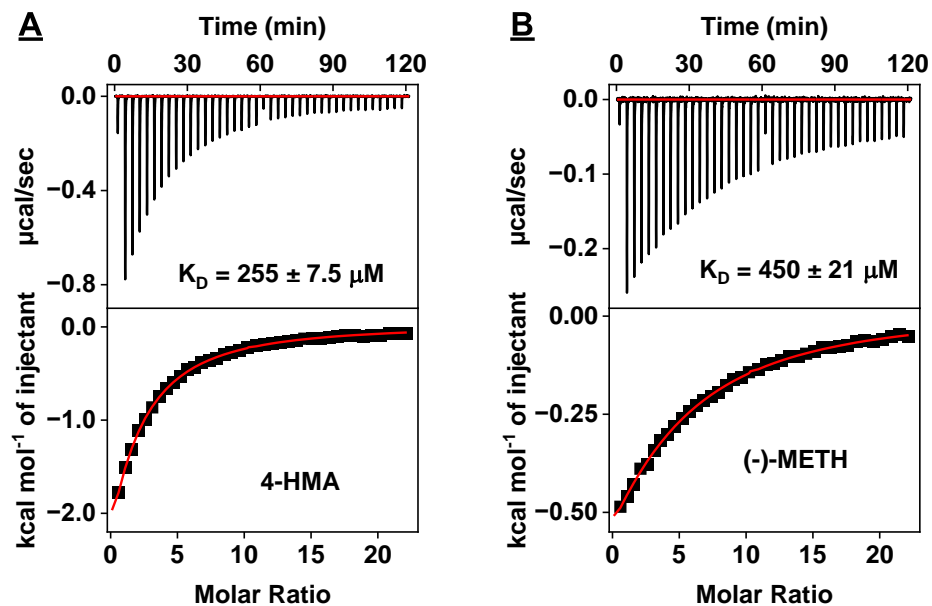

**Figure S30.** Binding affinity of ML4, an aptamer discovered in the fourth trial of library-immobilized SELEX, for interferents based on ITC. Top panels display the heat generated from each titration of ML4 into (A) 4-HMA and (B) (-)-METH. Bottom panels show the integrated heat of each titration after correcting for the heat of dilution of the titrant.

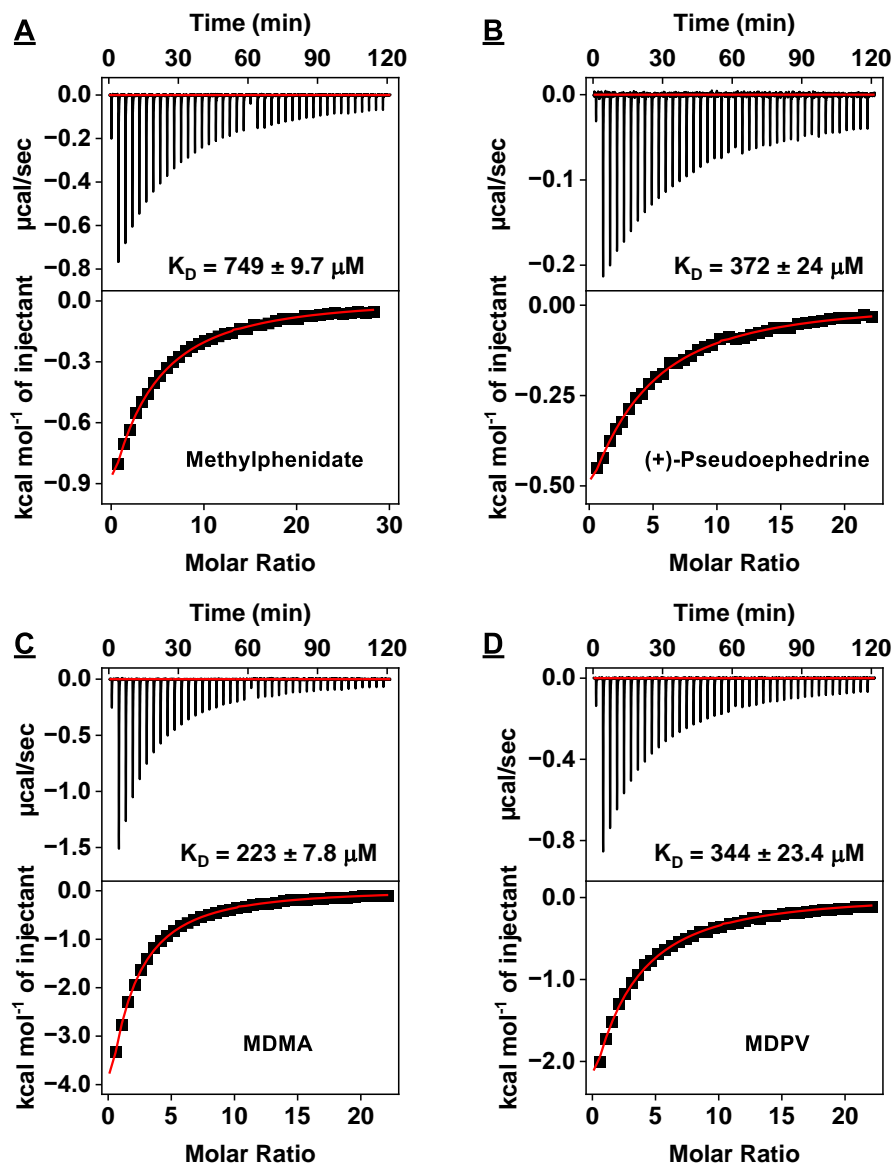

**Figure S31.** Binding affinity of ML4, an aptamer discovered in the fourth trial of library-immobilized SELEX, for interferents based on ITC. Top panels display the heat generated from each titration of ML4 into (A) methylphenidate, (B) (+)-pseudoephedrine, (C) MDMA, and (D) MDPV. Bottom panels show the integrated heat of each titration after correcting for the heat of dilution of the titrant.

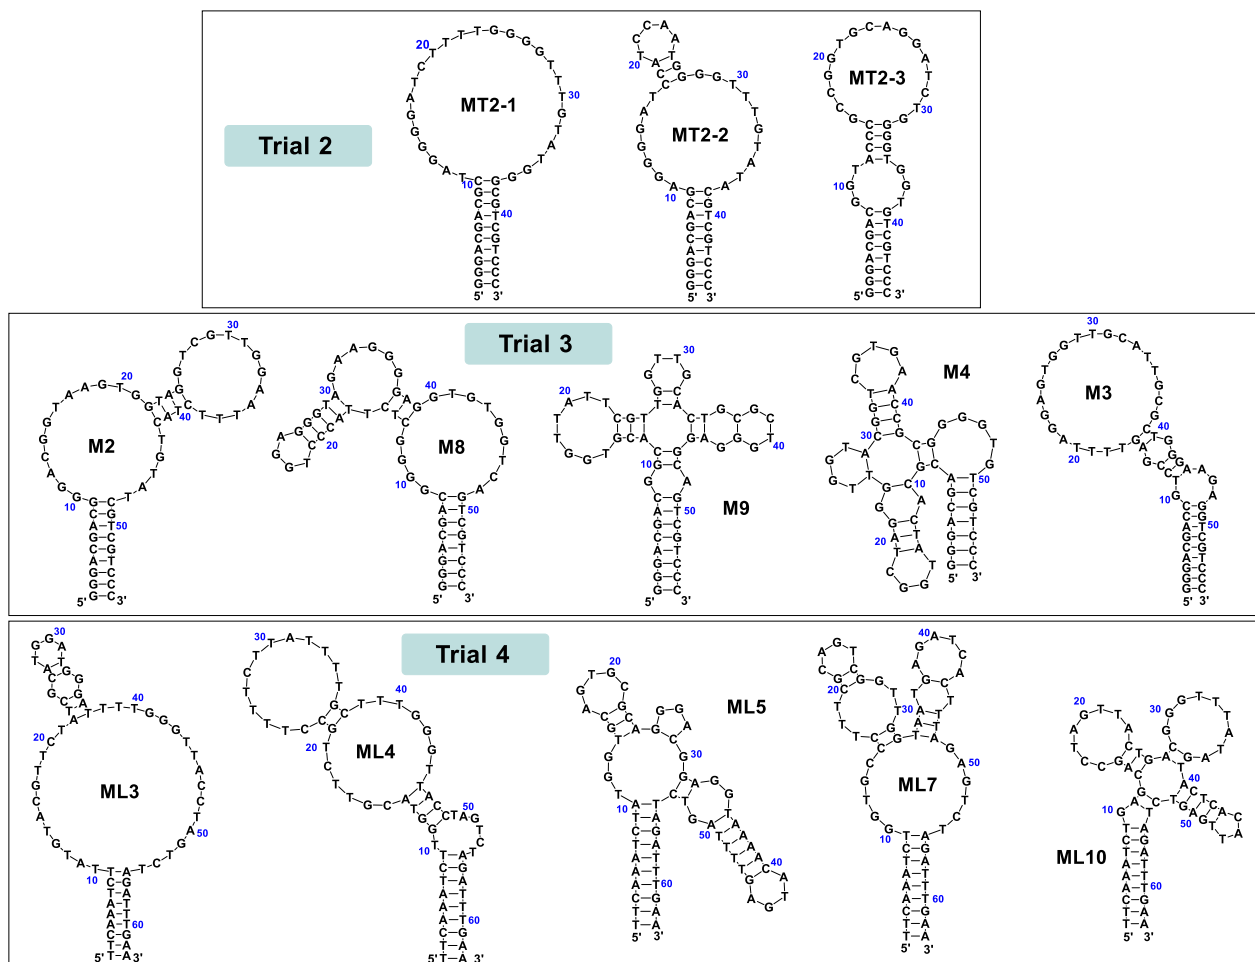

**Figure S32.** Secondary structures of methamphetamine aptamers obtained from different SELEX trials predicted by NUPACK.



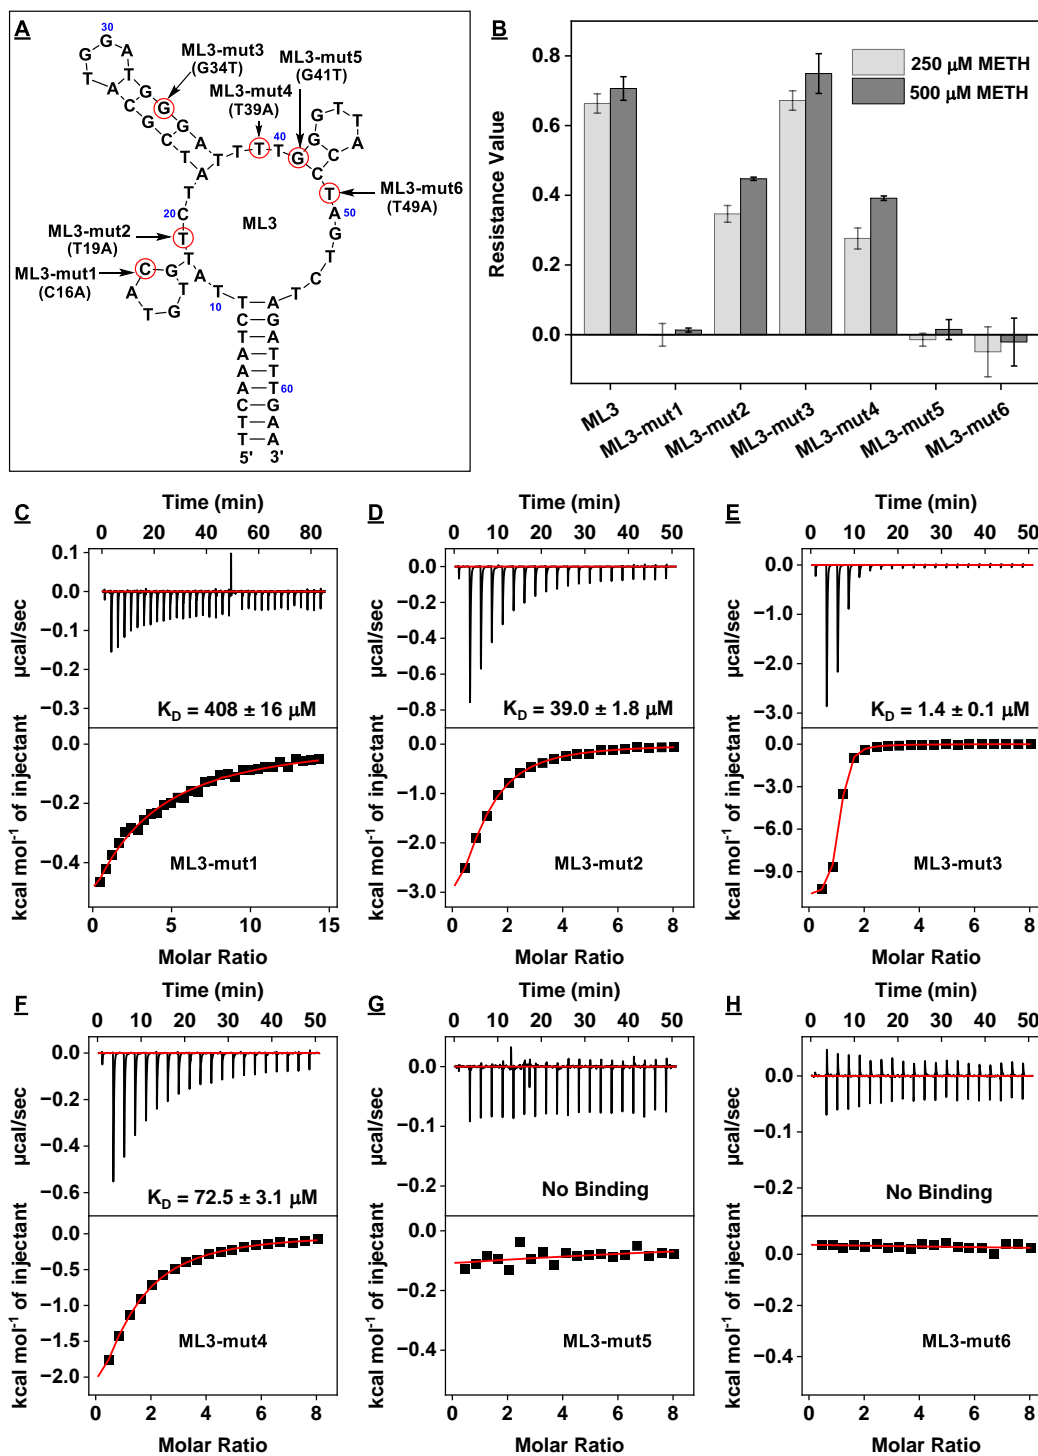

**Figure S33.** Mutational analysis of ML3. (A) Design of six point-mutants derived from ML3. (B) Resistance values of ML3 and six mutants determined by T5 exonuclease/exonuclease I digestion assay. (C–H) Binding affinity of mutated aptamers for (+)-methamphetamine based on ITC. Top panels display the heat generated from each titration of (+)-methamphetamine into (C) ML3-mut1, (D) ML3-mut2, (E) ML3-mut3, (F) ML3-mut4, (G) ML3-mut5, and (H) ML3-mut6. Bottom panels show the integrated heat of each titration after correcting for the heat of titrant dilution.

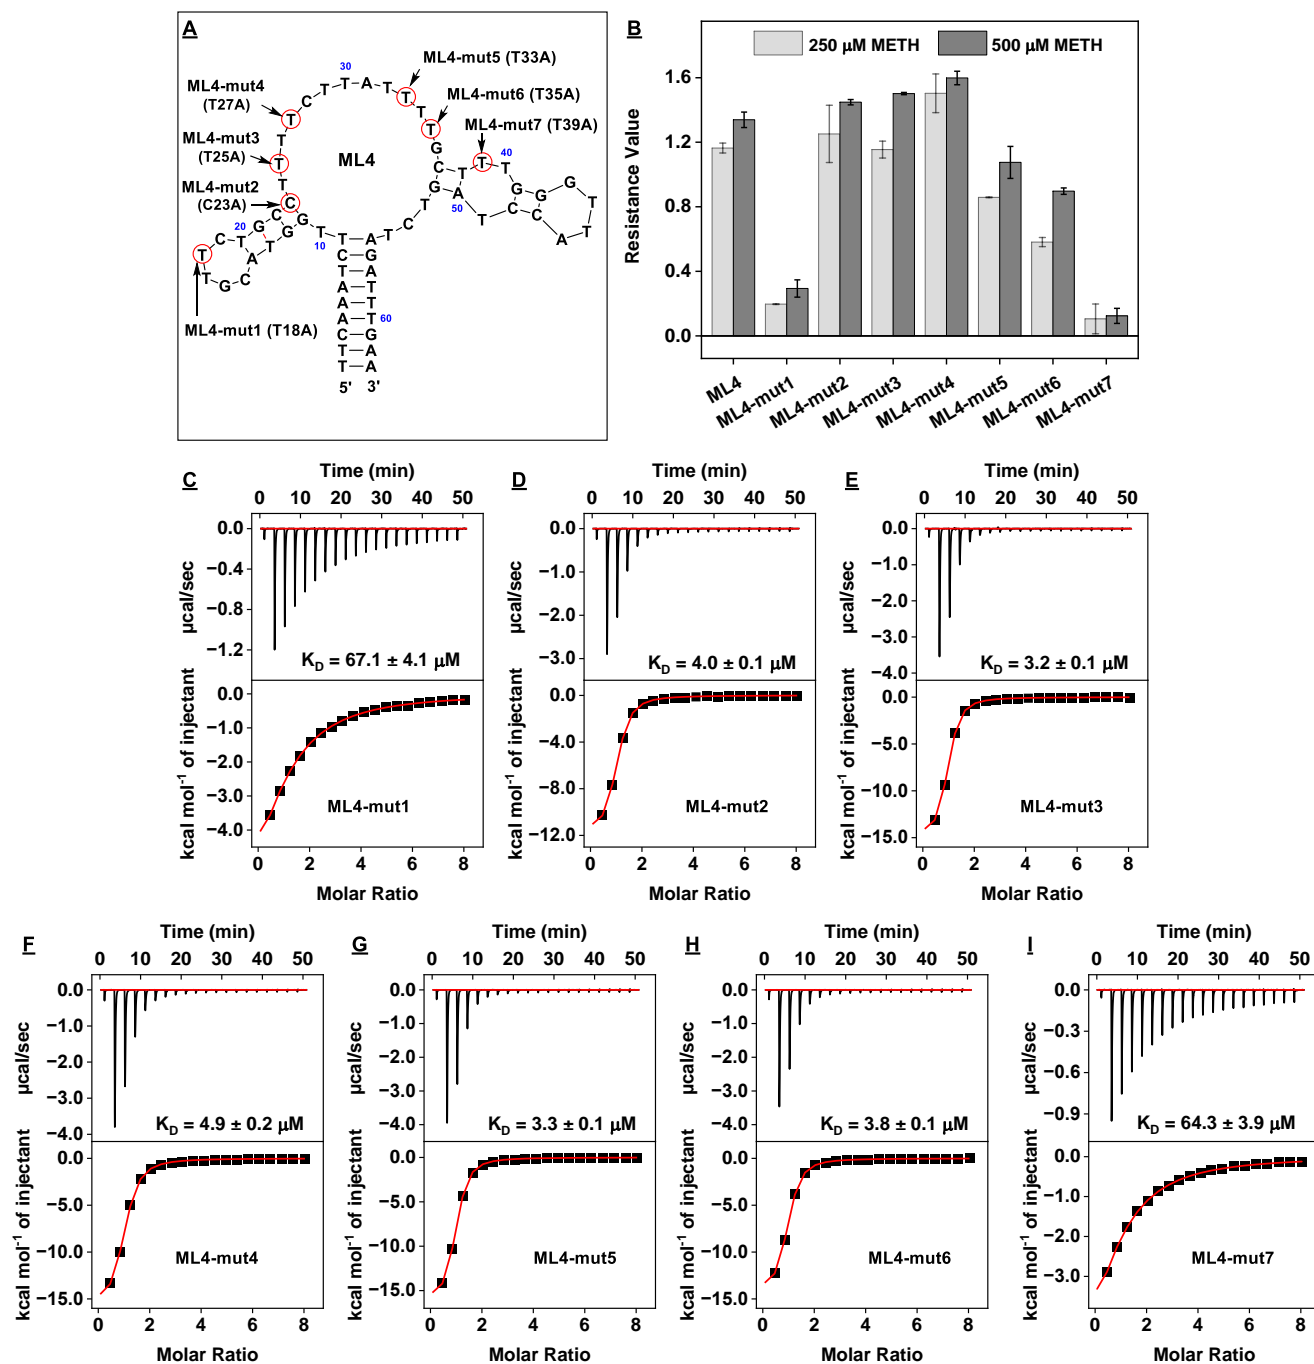

**Figure S34.** Mutational analysis of ML4. **(A)** Design of seven point-mutants derived from ML4. **(B)** Resistance values of ML4 and seven mutants determined by T5 exonuclease/exonuclease I digestion assay. **(C–I)** Binding affinity of mutated aptamers for (+)-methamphetamine based on ITC. Top panels display the heat generated from each titration of (+)-methamphetamine into **(C)** ML4-mut1, **(D)** ML4-mut2, **(E)** ML4-mut3, **(F)** ML4-mut4, **(G)** ML4-mut5, **(H)** ML4-mut6, and **(I)** ML4-mut7. Bottom panels show the integrated heat of each titration after correcting for the heat of titrant dilution.

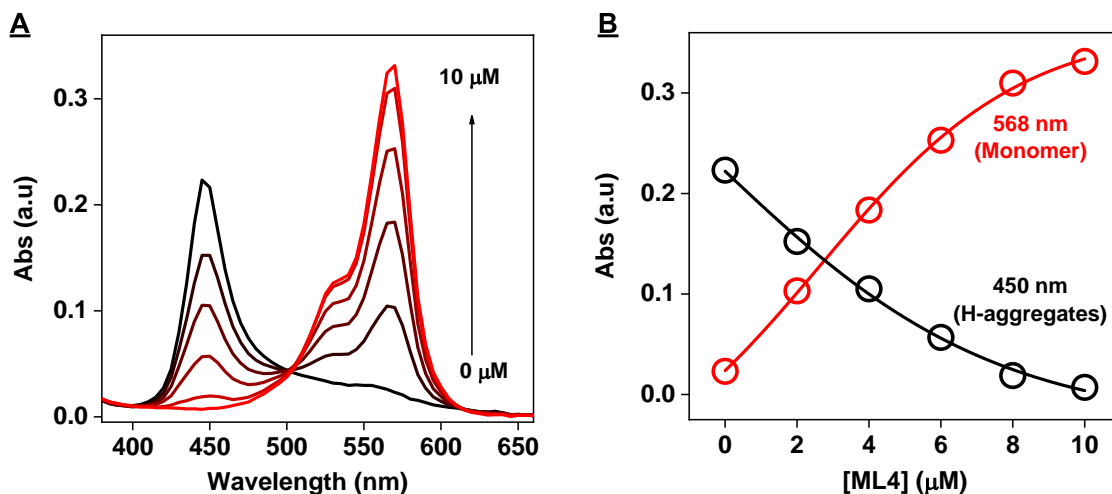

**Figure S35.** Binding of X-732-91B to aptamer ML4. (A) Absorbance spectra of solutions containing 4  $\mu\text{M}$  X-732-91B with 0, 2, 4, 6, 8 or 10  $\mu\text{M}$  ML4, where the black-to-red color gradient shows increasing aptamer concentrations. (B) Absorbance of X-732-91B monomers at 568 nm and H-aggregates at 450 nm plotted against the concentration of ML4.

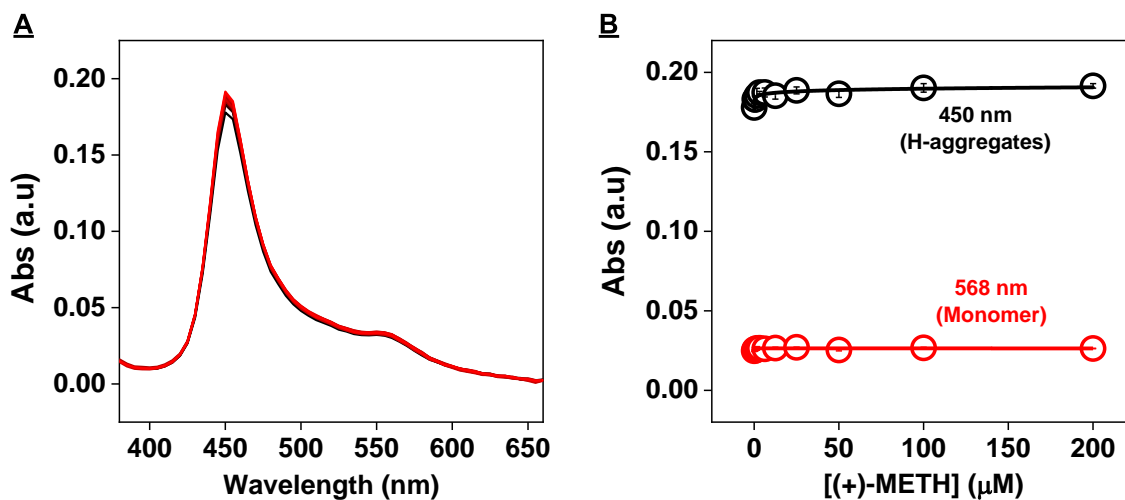

**Figure S36.** Effect of (+)-methamphetamine on the absorbance spectrum of X-732-91B alone. (A) Spectra of 4  $\mu\text{M}$  X-732-91B in the presence of 0, 0.39, 0.78, 1.56, 3.13, 6.25, 12.5, 25, 50, 100, and 200  $\mu\text{M}$  (+)-methamphetamine with no aptamer present, where the black-to-red color gradient represents increasing target concentrations. (B) Peak absorbance at 450 (black) and 568 (red) nm as a function of (+)-methamphetamine concentration.

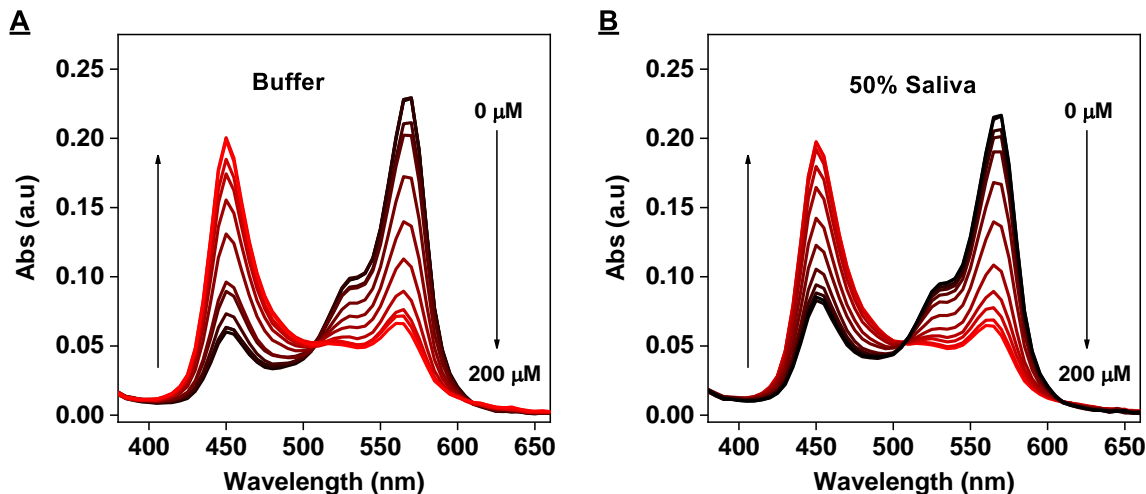

**Figure S37.** Detection of (+)-methamphetamine using X-732-91B and aptamer ML4. Absorbance spectra in (A) buffer and (B) 50% saliva for samples containing 4  $\mu\text{M}$  X-732-91B and 6  $\mu\text{M}$  ML4 in the presence of 0, 0.39, 0.78, 1.56, 3.13, 6.25, 12.5, 25, 50, 100, and 200  $\mu\text{M}$  (+)-methamphetamine, where the black-to-red color gradient represents increasing target concentrations.

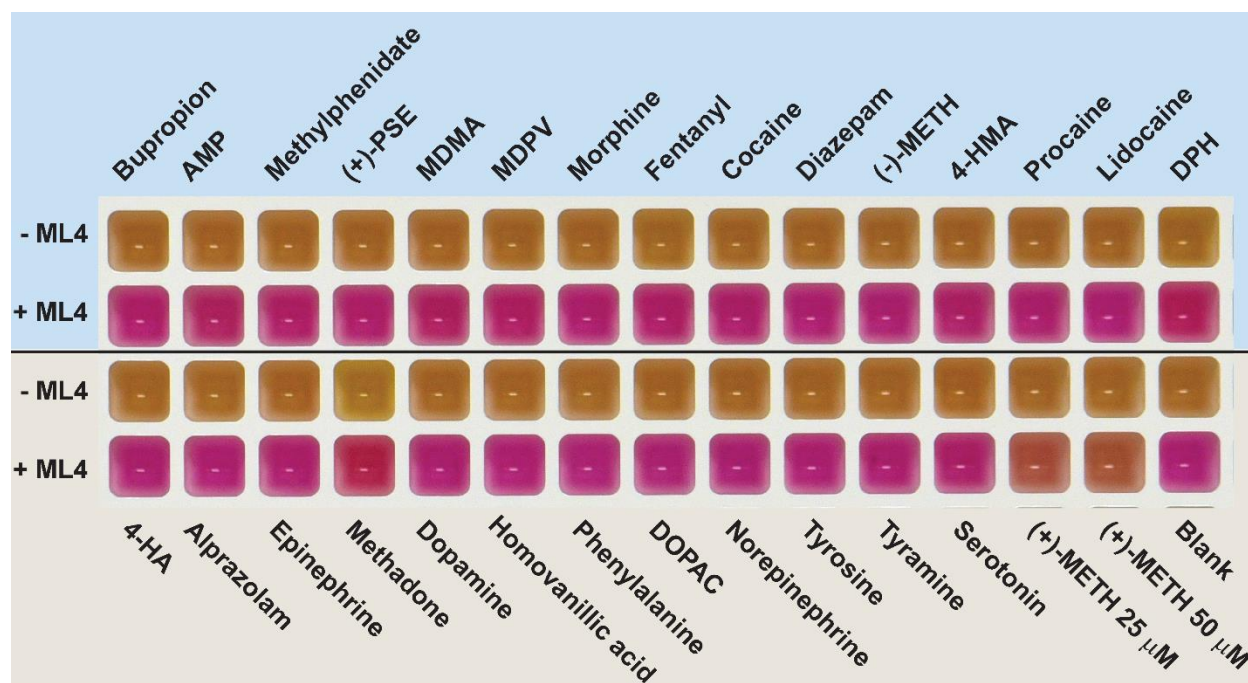

**Figure S38.** Specificity of a dye-displacement assay for (+)-methamphetamine based on aptamer ML4 and dye X-732-91B. Photographs were taken after samples containing dye without aptamer (-ML4) or dye-aptamer complex (+ML4) were challenged with (+)-methamphetamine or various interferents for 10 minutes.

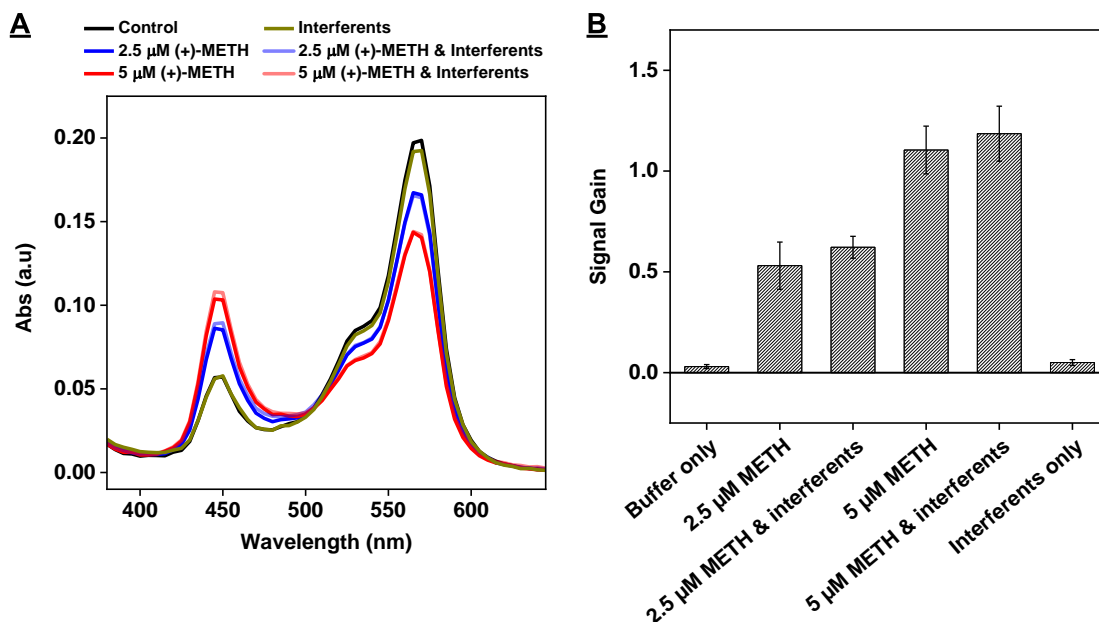

**Figure S39.** Detection of (+)-methamphetamine in a mixture of interferents using an aptamer-based dye-displacement assay. **(A)** Absorbance spectra in buffer for samples containing 4 μM X-732-91B and 6 μM aptamer ML4 in the presence of 2.5 and 5 μM (+)-methamphetamine alone or with a mixture of 1 μM morphine, 3 μM cocaine, 2 μM methadone, and 1 μM fentanyl. **(B)** Signal gain was calculated as  $(R-R_0)/R_0$ , where  $R$  and  $R_0$  are the ratio of the area under the curve (AUC) for dye aggregates (400–505 nm) relative to the AUC for monomers (505–620 nm) with and without target/interferent, respectively.

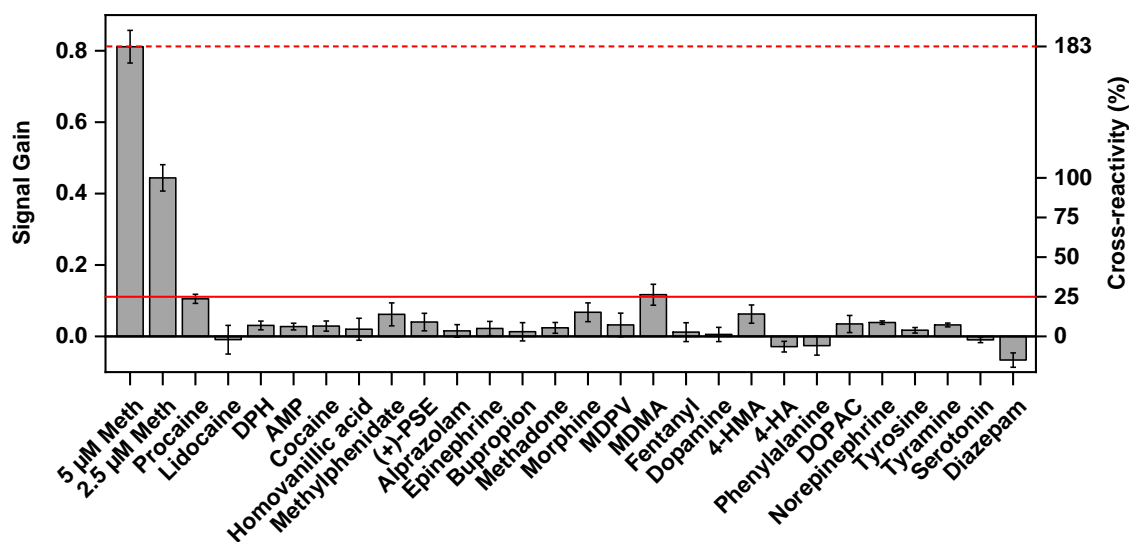

**Figure S40.** Specificity of a dye-displacement assay for (+)-methamphetamine based on aptamer ML4 and dye X-732-91B. The plot shows signal gain and assay cross-reactivity to clinically relevant target concentrations as well as much higher concentrations of various interferents. The red line demarcates 25% cross-reactivity relative to 2.5 μM (+)-methamphetamine.
